# Supplementary material
Source: publisher site journal article supplement (https://www.spandidos-publications.com/3424/downloadSupplementary)
Supplement: Supplementary file 1 [file downloadSupplementary]

## Sheet: g2_VS_g1_p005fc2_m
Table SII.
Probe ID	t-test P-value	Fold-change			Normalized signal (log2) of g2			Detection of g2			Normalized signal (log2) of g1			Detection of g1			Annotation
		fold-change	fold-change (abs)	Regulation	B1_NS	B2_NS	B3_NS	B1_flags	B2_flags	B3_flags	A1_NS	A2_NS	A3_NS	A1_flags	A2_flags	A3_flags	ProbeName.1	GeneSymbol	ProbeSeq	Start	Chromosome	End	Strand	ControlType	Ensembl	Gene_ID	Accession	Description	GO	TIGRID
A_21_P0000237	0.0463723	0.0245301	40.7663	down	2.37994	0.879563	2.05763	P	A	A	8.3824	4.24261	6.70433	P	P	P	A_21_P0000237	SNORA10	CTCCTAATGCACGACAGACCCGCCCAGAATGGCCTCTCTGTTCCTAGGAGTGCGACAATT	2012394	chr16	2012335	-	FALSE	---	574042	NR_002327	"small nucleolar RNA, H/ACA box 10"	---	THC2575940
A_33_P3389827	0.014428	0.0312514	31.9986	down	3.48254	3.44981	1.4716	P	A	A	5.99427	7.70168	9.03378	P	P	P	A_33_P3389827	PROM2	TGAGGAAGAGGAGAGAGAAGAGATGGACAGACCTCAGATCCATTAAAGTGTTCTCACTTC	95956061	chr2	95956002	+	FALSE	ENST00000487138	150696	NM_001165978	prominin 2	GO:0060170|GO:0009986|GO:0031528|GO:0031410|GO:0042995|GO:0044393|GO:0043088|GO:2001287|GO:0005902|GO:0005929|GO:0016323|GO:0016324|GO:0031346|GO:0005887|GO:0015485|GO:0048550|GO:2000369|GO:0071914|GO:0001934|GO:0045121|GO:0070062	NP1474169
A_22_P00001667	0.0122807	0.0363171	27.5352	down	2.13018	0.969074	1.13693	A	A	A	4.53142	6.90696	6.52146	P	P	P	A_22_P00001667	RALY	TCCCCATATATTTGCTTGCCATGGACCCTGGGCAGCAGGGAGAGAGTAGAGATTTGTCAA	32669754	chr20	32669695	+	FALSE	ENST00000375114	22913	NM_016732	RALY heterogeneous nuclear ribonucleoprotein	GO:0005515|GO:0000166|GO:0000398|GO:0003723|GO:0005634|GO:0071013	THC2714189
A_21_P0007561	0.0185318	0.0405159	24.6817	down	3.67447	3.44061	0.951404	P	A	A	5.68128	7.89259	8.41743	P	P	P	A_21_P0007561	---	ATAAGGTGGTGCACAATGATGAGAGAGAGGACTTTGAGGGTTTTCTTCCTAGGTGCTCAA	54155852	chr12	54155793	+	FALSE	ENST00000566418	---	---	---	---	---
A_19_P00802433	0.0412436	0.0405507	24.6605	down	5.89077	6.57543	2.2796	P	P	A	8.64696	10.3261	11.1358	P	P	P	A_19_P00802433	LINC01564	AGAGCTCAAAAGGCAAGAAATCAGCAAGAGAGAGAGATGAAGCATGAGAAATGAGCAAAA	53495897	chr6	53495838	+	FALSE	---	101927171	---	long intergenic non-protein coding RNA 1564	---	THC2716204
A_22_P00005468	0.0292789	0.0444458	22.4993	down	4.78248	3.7889	1.05143	P	A	A	7.00894	8.67112	8.78268	P	P	P	A_22_P00005468	lnc-DYDC1-4	ATATCTAGTTTAGCCTTTAATTCTCCCCAGGCGAGAGAGAGATGTCACTCAGGACTGCTT	83988797	chr10	83988738	-	FALSE	---	---	---	lnc-DYDC1-4:4	---	THC2722395
A_19_P00805812	0.0471164	0.0448234	22.3098	down	4.75663	5.04814	0.82817	P	P	A	7.3473	9.43514	9.03825	P	P	P	A_19_P00805812	lnc-UQCRFS1-9	ACAGCAAGTTACTCTGAGTATTGTGGAAACAAACTGAAATTAGAGTGAGAGAGAGAGAGA	28262798	chr19	28262739	-	FALSE	---	---	---	lnc-UQCRFS1-9:20	---	THC2535688
A_21_P0002541	0.00614498	0.0460664	21.7078	down	3.02704	2.76262	0.999414	P	A	A	5.73509	7.53606	7.00894	P	P	P	A_21_P0002541	lnc-TNP1-2	TACAAGATGCTCAGTTCTTGAATGAGGGTAATGACAATGGAGAGAGGAGAGACAAATGGA	217726622	chr2	217726563	-	FALSE	---	---	---	lnc-TNP1-2:1	---	---
A_22_P00004601	0.0139009	0.0463226	21.5877	down	4.00159	3.97083	1.56109	P	A	A	6.3303	8.56633	8.17211	P	P	P	A_22_P00004601	---	ACTTGTGAGGAGAATAAAAATTTCCATTTAAGAAAAATTAGAGAAGCAGAGAGAGAGAAT	5364211	chr8	5364152	-	FALSE	ENST00000517807	---	BC040995	---	---	THC2614513
A_22_P00014433	0.0076305	0.0477943	20.923	down	1.97825	2.41552	1.08317	A	A	A	4.83951	6.85382	6.5561	P	P	P	A_22_P00014433	LOC101928741	GAACTGCAGCAGGAGGAGAGAGAGTGGCGAGGACGTCTCACGTGTGAGGACGTCTCACGT	65505215	chr5	65505156	-	FALSE	ENST00000509924	101928741	XR_241805	uncharacterized LOC101928741	---	THC2605937
A_22_P00002448	0.0243622	0.0498155	20.0741	down	3.81268	3.97984	0.900761	P	A	A	6.31294	8.27278	7.95127	P	P	P	A_22_P00002448	PWRN1	CAGTGAGATTCACATGACCATCGTTTATGACATAGGAAGAATAAAAGGAGAGAGAGAGAG	24813232	chr15	24813173	+	FALSE	ENST00000565241	791114	NR_026646	Prader-Willi region non-protein coding RNA 1	---	THC2604578
A_33_P3245987	0.00692822	0.0505181	19.7949	down	3.52051	2.79147	1.96011	P	A	A	5.7629	7.33598	7.81609	P	P	P	A_33_P3245987	---	TCTTTGAAGCAAGGGAAGGAGCCCTGGATGATGGAGAGAGAGGTGACAGGTGATCCCTGC	45113730	chr20	45113671	+	FALSE	ENST00000504759	---	---	---	---	NP336097
A_23_P334218	0.0176239	0.0510815	19.5766	down	3.68526	2.55828	0.675683	P	A	A	5.52255	7.78824	7.03771	P	P	P	A_23_P334218	TBC1D31	TCATCTTTTGGCTGCATAGAATGCATGTCACCTTGAGACGGTCGAGAGAGAGACCTATTT	124164220	chr8	124164161	+	FALSE	ENST00000287380	93594	NM_145647	"TBC1 domain family, member 31"	GO:0005813|GO:0032851|GO:0005097	NP1174644
A_21_P0003929	0.0349053	0.0512149	19.5256	down	3.88865	1.71962	0.947577	P	A	A	4.60408	6.57039	8.08647	P	P	P	A_21_P0003929	LOC100505811	TCTGGTCAGAGATGAGAGAGAAAGATTTTTCTGGGTAAAGTTAACAAGGTATATAGGGTG	117619758	chr5	117619699	+	FALSE	ENST00000503877	100505811	NR_104609	uncharacterized LOC100505811	---	THC2602515
A_22_P00000832	0.00576172	0.0522736	19.1301	down	2.70481	1.06487	1.01913	P	A	A	5.64403	5.8421	6.58711	P	P	P	A_22_P00000832	---	GATACCAAGAGAGAAGAGAGAATATTATCTGAGGAAATTACATCCTCCTCTCAGGAGAAG	180311243	chr4	180311184	-	FALSE	ENST00000512036	---	---	---	---	---
A_22_P00008706	0.0118081	0.0529848	18.8733	down	2.522	1.7994	1.03761	A	A	A	4.49343	6.65585	6.48352	P	P	P	A_22_P00008706	MAPT-AS1	ACAGTAGCCCAGGATGTGCACTATGGACTGTTACAAGAGAGAGACATGATCTTCCTTAAG	43921414	chr17	43921355	-	FALSE	---	100128977	NR_024559	MAPT antisense RNA 1	---	THC2728807
A_23_P66543	0.0112094	0.053701	18.6216	down	2.65681	0.946043	1.43511	P	A	A	4.41017	6.35597	6.65094	P	P	P	A_23_P66543	PIK3R5	CTCAGGGTTCTGGGAAAGCAACAGCTATCAGAGAGAGAAGGGCCAGACCCCATAGCCTCT	8783792	chr17	8783733	-	FALSE	ENST00000581552	23533	NM_014308	"phosphoinositide-3-kinase, regulatory subunit 5"	GO:0051897|GO:0006661|GO:0030168|GO:0005634|GO:0044281|GO:0031683|GO:0014065|GO:0005829|GO:0005737|GO:0046935|GO:0007186|GO:0016020|GO:0043551|GO:0007596|GO:0043406|GO:0006644|GO:0005944	THC2485160
A_19_P00325604	0.00963148	0.0588744	16.9853	down	3.2498	3.08729	1.19676	P	A	A	5.82537	6.31188	7.70539	P	P	P	A_19_P00325604	LINC-ROR	TAGGGAAAACCAAACATTGTCAAGAGGAGAGGAAGCCTGAGAGTTGGCATGAATCAGAGT	54722409	chr18	54722350	-	FALSE	ENST00000553704	100885779	NR_048536	"long intergenic non-protein coding RNA, regulator of reprogramming"	---	---
A_24_P405621	0.0217557	0.0596053	16.777	down	2.76835	0.669047	1.16636	P	A	A	3.85679	6.50616	6.1948	P	P	P	A_24_P405621	NISCH	TGAAGTCCAGTGGCAGGTGTTTGTCCCCAGTGCTGAGAGCAGAGAGAAGCTCATCTCGCT	52526437	chr3	52526378	+	FALSE	ENST00000489895	11188	NM_007184	nischarin	GO:0005515|GO:0030336|GO:0030036|GO:0005886|GO:0006915|GO:0042802|GO:0005829|GO:0016601|GO:0005178|GO:0007186|GO:0016020|GO:0032228|GO:0008217|GO:0006006|GO:0055037|GO:0035091|GO:0008227|GO:0048243|GO:0005769	THC2683893
A_23_P436284	0.00614556	0.059811	16.7193	down	2.92059	3.00075	1.42795	P	A	A	5.38185	7.20984	6.85382	P	P	P	A_23_P436284	SLC51B	AGAAAAGCCAAACTTGGCCCAGGTGGAACTTGAGTTAAAAGAGAGAGATGTGCTGTCAGT	65345468	chr15	65345409	+	FALSE	ENST00000334287	123264	NM_178859	"solute carrier family 51, beta subunit"	GO:0043234|GO:0005215|GO:0070863|GO:0031647|GO:0046982|GO:0005886|GO:0015721|GO:0090314|GO:0060050|GO:0016021	THC2487748
A_22_P00017766	0.0324355	0.0622049	16.0759	down	3.70869	2.84882	0.960457	P	A	A	4.76674	6.62254	7.85503	P	P	P	A_22_P00017766	---	AGAAGAGCAGAGAGATGAAGGCCTCCATGCCACAGCCCAGGCCGTGCACATTTGTGTTGA	61798337	chr20	61798278	-	FALSE	ENST00000423020	---	DA103928	---	---	---
A_22_P00002236	0.0239989	0.0622871	16.0547	down	4.23289	4.06935	1.42272	P	A	A	6.11822	8.15891	8.01774	P	P	P	A_22_P00002236	KCNMA1-AS1	CCAAATATTATCTAAGATGTGTGTTCATGAAAGAGAGAAAGAGAGAGGATAAGTGCACAC	78663761	chr10	78663702	+	FALSE	---	101929328	XR_246137	KCNMA1 antisense RNA 1	---	THC2609827
A_33_P3252333	0.0230622	0.0628433	15.9126	down	5.40623	8.32461	6.08848	P	P	P	10.5917	11.8262	10.7184	P	P	P	A_33_P3252333	SNORD3B-1	ATAGTGTGTTACTAGAGAAGTTTCTCTGAACGTGTAGAGCACCGAAAACCCCGAGGAAGA	18965311	chr17	18965252	+	FALSE	ENST00000577988	26851	NR_003271	"small nucleolar RNA, C/D box 3B-1"	---	THC2579229
A_23_P200874	0.00938295	0.0628975	15.8989	down	0.788405	0.908234	0.809473	A	A	A	4.12671	5.45187	4.58035	P	P	P	A_23_P200874	CEP85	CTAGGGATTATAGCCAGGACTCTAATCTGCCTACCATGCCATTTAACAAGAGATCCCACT	26604436	chr1	26604377	+	FALSE	ENST00000476272	64793	NM_022778	centrosomal protein 85kDa	GO:0005515|GO:0005813|GO:0005737|GO:0000922|GO:0005794|GO:0005730	THC2466447
A_24_P350589	0.00233251	0.0636784	15.7039	down	2.07717	0.948864	0.969258	A	A	A	4.51179	5.97534	5.37846	P	P	P	A_24_P350589	RNF150	CAATAGCAACAGAAATATAAATTATATTCCATTCCCAGAGAGAGAATGCGCTTTGGATTG	141787036	chr4	141786977	-	FALSE	ENST00000306799	57484	NM_020724	ring finger protein 150	GO:0008270|GO:0016021	THC2616513
A_21_P0011780	0.024294	0.064358	15.5381	down	2.81681	2.80872	0.790481	P	A	A	4.33517	6.68784	6.93011	P	P	P	A_21_P0011780	LINC01534	TAAGAGCAACTTGCTTGCGCATTAAAGATCACTTGGAGAGAGAGGTCCAGTGAGCAACAA	37176899	chr19	37176840	-	FALSE	ENST00000433232	101927621	NR_110708	long intergenic non-protein coding RNA 1534	---	THC2731778
A_21_P0013455	0.0194355	0.0643901	15.5303	down	4.38439	3.59291	1.66036	P	A	A	5.91953	8.09009	7.83169	P	P	P	A_21_P0013455	ZNF767P	CTGCTAAACTAAAGTAGATTAATGAGAAGGGAGAGAGAGCCAAGACCATCAAGCAGACAA	149260687	chr7	149260628	-	FALSE	ENST00000481762	79970	---	"zinc finger family member 767, pseudogene"	---	---
A_21_P0013782	0.0109767	0.0662935	15.0844	down	2.55313	1.94966	0.981564	P	A	A	4.35361	6.33855	6.23295	P	P	P	A_21_P0013782	XLOC_l2_015585	TTCTTCAGAGAGAGAGGTTGTTGAAAGACTCTGTATTGAACCAAGGTGCTCTACACAGTA	102098292	chrX	102094877	+	FALSE	---	---	---	---	---	---
A_33_P3395971	0.0038918	0.0683918	14.6216	down	0.936357	1.04715	0.886861	A	A	A	4.29109	4.83951	5.21045	P	P	P	A_33_P3395971	CTU1	ACTGGGAGGAAATGGAAGATCAGAGAAGTTGAGGTGCTCAATAAATGGTGACCACTTGGA	51600922	chr19	51600863	-	FALSE	ENST00000421832	90353	NM_145232	cytosolic thiouridylase subunit 1	GO:0005739|GO:0005515|GO:0002098|GO:0000049|GO:0016779|GO:0034227|GO:0032447|GO:0005829	THC2605436
A_33_P3219197	0.0248318	0.0694945	14.3896	down	3.04654	0.73136	2.30556	P	A	A	6.13655	4.23961	6.96201	P	P	P	A_33_P3219197	TBC1D10B	CCCCTTGGGTTCCAGCAAGGAGACCCGGAAGCAGGAGAAGGAGCGGCAGAAACAGGAGAA	30369553	chr16	30369494	-	FALSE	ENST00000478158	26000	NM_015527	"TBC1 domain family, member 10B"	GO:0005515|GO:0032313|GO:0005737|GO:0005886|GO:0042147|GO:0032851|GO:0005097	THC2461204
A_22_P00005781	0.0160881	0.0699451	14.2969	down	3.3572	3.04029	0.944754	P	A	A	5.28825	6.92969	7.02959	P	P	P	A_22_P00005781	lnc-ENTHD1-1	CTCAAGAGCTGGAAAACTAGGAGAAATCAAGTCTAAAGAGAGAGACAGAATAAATCGTCT	40439592	chr22	40439533	-	FALSE	---	---	BC038752	lnc-ENTHD1-1:1	---	---
A_23_P93217	0.0390305	0.0705488	14.1746	down	5.08404	4.5795	1.90229	P	P	A	7.50399	8.60116	8.24236	P	P	P	A_23_P93217	SLC22A7	AGTGAACTTCTCCTATTACGGCCTGAGTCTGGATGTGTCGGGGCTGGGGCTGAACGTGTA	43270003	chr6	43269944	+	FALSE	ENST00000436107	10864	NM_153320	"solute carrier family 22 (organic anion transporter), member 7"	GO:0016323|GO:0035634|GO:0034220|GO:0016020|GO:0005886|GO:0015347|GO:0005887|GO:0015711|GO:0055085	NP302336
A_23_P207125	0.00644647	0.0751824	13.301	down	3.46078	2.27106	1.59549	P	A	A	5.60834	6.75491	6.55546	P	P	P	A_23_P207125	NLGN2	CTGGCATTTTGTGGGGTGTTAGTGCCAAACTTGAATAGGGGCTGGGGTGCTGTCTTCCAC	7322795	chr17	7322736	+	FALSE	ENST00000302926	57555	NM_020795	neuroligin 2	GO:0052689|GO:0030054|GO:2000311|GO:0035418|GO:0045202|GO:0005615|GO:0097116|GO:0016337|GO:0002087|GO:0045211|GO:0050885|GO:0004872|GO:0050839|GO:0097119|GO:0007158|GO:0035641|GO:0051965|GO:0097151|GO:2000463|GO:0009986|GO:0051968|GO:0050804|GO:0072553|GO:0060077|GO:0007416|GO:0042043|GO:0032230|GO:0019233|GO:0045217|GO:0097104|GO:0042734|GO:0097105|GO:0016020|GO:0050808|GO:0005887|GO:0008152	NP1175797
A_24_P238570	0.00143956	0.0801611	12.4749	down	2.37636	1.75607	1.23274	A	A	A	4.84095	5.4829	5.97376	P	P	P	A_24_P238570	---	AGAAAAATAAGAACCATGAGCAGTCGCGGTGCCTCTATTATTTTCCCAGGACGATTGCTC	86069924	chr16	86069865	+	FALSE	---	---	AF384996	---	---	THC2502707
A_22_P00017827	0.0165477	0.082141	12.1742	down	3.64007	4.23518	2.57831	P	A	A	5.64437	7.51327	7.78824	P	P	P	A_22_P00017827	lnc-ZC3H12D-2	AGAGAGAGGGATGGAAATTGTGACCAGAGAGTTGGAGTTGGGACCCCTGTCTTGATCACT	149348895	chr6	149348836	-	FALSE	---	---	BG211832	lnc-ZC3H12D-2:1	---	THC2691069
A_22_P00005250	0.0220435	0.0826125	12.1047	down	4.97024	4.70532	2.47979	P	P	A	7.08356	7.66974	8.72622	P	P	P	A_22_P00005250	DLX6-AS1	GACTAAACTATAAGGGCACTAACATGTCAATAGTAGGCTAACACATCCATGGAAAATATA	96598174	chr7	96598115	-	FALSE	---	285987	NR_015448	DLX6 antisense RNA 1	---	THC2514477
A_24_P186274	0.000394655	0.0849583	11.7705	down	1.60267	2.40733	1.96499	A	A	A	5.10194	5.73724	5.81905	P	P	P	A_24_P186274	IGFBPL1	AGTGACGGTTCTAGATCTGAGTAAATACAGGAGCTTCCACTTCCCAGCTCCCGATGACCG	38411463	chr9	38411404	-	FALSE	ENST00000377694	347252	NM_001007563	insulin-like growth factor binding protein-like 1	GO:0005576|GO:0001558|GO:0005520	THC2479806
A_33_P3827035	0.0433958	0.0861846	11.603	down	4.15685	3.17831	0.983963	P	A	A	6.26926	7.0224	6.99797	P	P	P	A_33_P3827035	ANKRD18DP	AAAGACATGTATAGGGACAGAAAGAAGATGAATGTTTCTGTAGGGCTGGGGCTGGAAATG	197785172	chr3	197785113	-	FALSE	ENST00000335478	348840	NR_003291	"ankyrin repeat domain 18D, pseudogene"	---	THC2488012
A_33_P3359368	0.0235733	0.0872733	11.4583	down	5.15048	4.29093	2.42863	P	P	A	6.70822	8.43461	7.92124	P	P	P	A_33_P3359368	DHRS4L1	ATTTTTTGCCCAGGCCACTGGGGAATTTGAGGGGAGATGAGAGAGAAGGAAGCTGGAGTG	24520507	chr14	24520448	+	FALSE	---	728635	NM_001277864	dehydrogenase/reductase (SDR family) member 4 like 1	GO:0016491|GO:0055114	---
A_33_P3287379	0.00865118	0.0876593	11.4078	down	3.12063	2.54383	1.52811	P	A	A	4.83185	6.13309	6.64358	P	P	P	A_33_P3287379	COG8	TCAGGAGCCCCTCGCCTTTATCCTGCCAAAGAGAGAGACGCTTTTCACCCTGGATGACCA	69364937	chr16	69364878	-	FALSE	ENST00000306875	84342	NM_032382	component of oligomeric golgi complex 8	GO:0016020|GO:0000139|GO:0017119|GO:0015031	THC2467033
A_33_P3299665	0.00012942	0.0879575	11.3691	down	2.06071	1.99843	1.70722	A	A	A	5.43881	5.52255	5.34478	P	P	P	A_33_P3299665	LOC100505530	GAAGGGAGCCTGCAAACACATTTCCTGCTATCATCTCTCCACCCCAGAATGACTTTCCCT	37503437	chr6	37503378	+	FALSE	---	100505530	---	uncharacterized LOC100505530	---	THC2631354
A_22_P00004303	0.000636293	0.089184	11.2128	down	1.25132	0.753187	1.55501	A	A	A	4.95096	4.67481	4.4638	P	P	P	A_22_P00004303	---	GAGTGCCAATATGATTCCAAGGTTCTTAGCACACTGTATATTACCTCACTCCTCCTACAG	17049039	chr9	17048980	+	FALSE	ENST00000430545	---	BG432982	---	---	---
A_21_P0002696	0.00297081	0.0902911	11.0753	down	1.64927	2.2002	1.10417	A	A	A	4.42993	5.01021	5.79866	P	P	P	A_21_P0002696	lnc-AC131097.4.1-3	TGTTTCGTTTTTGTAAATATGGCTACCACAAAATATAAGGGCACGCAGGTTCACGCCCTC	243000190	chr2	243000131	-	FALSE	---	---	---	lnc-AC131097.4.1-3:5	---	---
A_19_P00322828	0.00702036	0.0970732	10.3015	down	3.12711	4.69825	3.26814	P	P	P	7.02029	7.79128	6.71905	P	P	P	A_19_P00322828	MIAT	CATCTCCAGGACTCCTGGCCTGGACTTCTCTTTGGACCTCGGGTGACCTTGGATTCTGGC	27064198	chr22	27064139	+	FALSE	ENST00000613780	440823	NR_003491	myocardial infarction associated transcript (non-protein coding)	---	THC2497516
A_22_P00015104	0.00534224	0.0972206	10.2859	down	1.62123	2.528	0.913263	A	A	A	4.46804	5.47611	5.44947	P	P	P	A_22_P00015104	lnc-SNX11-2	AAAGAGAGAGAAAGGGAGAGAAGAGTCATGGACCCTACTTTATGGTTGCCATGGATGCAA	46384760	chr17	46384701	+	FALSE	---	---	S71020	lnc-SNX11-2:1	---	NP090174
A_33_P3280044	0.0458005	0.0990391	10.097	down	2.88018	3.58182	3.13585	P	A	P	6.62789	4.81584	7.29394	P	P	P	A_33_P3280044	ANKRD11	AGTTTGATGAGGACGACGAGCAGGACAGGGTTCCTCCGGTGGACGACAAGCACCTATTGA	89351907	chr16	89351848	-	FALSE	ENST00000568100	29123	NM_001256182	ankyrin repeat domain 11	GO:0060348|GO:0005737|GO:0060325|GO:0035264|GO:0005886|GO:0001894|GO:0048705|GO:0042475|GO:0005654|GO:0005634|GO:0001701	THC2466696
A_33_P3350673	0.0152138	0.101002	9.90083	down	1.87446	3.64282	1.55848	A	A	A	5.10831	6.42638	6.10088	P	P	P	A_33_P3350673	HOPX	CATGATAGTCTGCCGTGCTTGGCTTTCGATTACTTTTCTCTACTGCCGCCCCAGTGTAAA	57516909	chr4	57516850	-	FALSE	ENST00000381260	84525	NM_001145460	HOP homeobox	GO:0016575|GO:0048286|GO:0008016|GO:0043393|GO:0005634|GO:0000122|GO:0001829|GO:0003677|GO:0006351|GO:0007507|GO:0043415|GO:0051155|GO:0045596	THC2489098
A_21_P0003545	0.0292565	0.104581	9.56194	down	3.31891	3.44008	1.22493	P	A	A	4.59792	6.56623	6.6805	P	P	P	A_21_P0003545	---	CTAAACGATACCAAGAGAGAAGAGAGAATATTATCTGAGGAAATTACATCCTCCTCTCAG	180386354	chr4	180311190	-	FALSE	ENST00000512036	---	---	---	---	---
A_21_P0011595	0.037093	0.104973	9.52628	down	3.50756	4.01366	1.19889	P	A	A	5.09451	6.94661	6.98376	P	P	P	A_21_P0011595	XLOC_l2_006101	TGTCCTCCCCACATAGCTAGAGTGAATGAACTAAAAAAGAGAGAGAACACACACAGCCCA	43665719	chr17	43665660	-	FALSE	---	---	---	---	---	---
A_22_P00015395	0.030828	0.110862	9.02021	down	2.99046	4.64439	2.31113	P	P	A	6.46532	6.98753	6.98619	P	P	P	A_22_P00015395	---	ACTTGTGCAGTGACTTGCCATTGAGTCCGGGAGGTTCTGGAGACCTGGGTGACGGAAGAA	4233487	chr16	4233428	-	FALSE	ENST00000573220	---	---	---	---	---
A_21_P0005178	0.00892147	0.111496	8.96895	down	1.76708	3.25556	2.55848	A	A	A	5.47199	6.06033	5.85553	P	P	P	A_21_P0005178	lnc-CITED2-4	AAATCTTGCCTAAATGCTCCCTACCATGAATGACCACATGTTCCAGCATGGTATGCCAAG	140415592	chr6	140415533	-	FALSE	---	---	---	lnc-CITED2-4:1	---	---
A_21_P0001821	0.0146396	0.117744	8.49298	down	2.85794	3.01509	1.65995	P	A	A	4.41351	6.03171	6.13619	P	P	P	A_21_P0001821	---	AAGAGCTTTCTGCATAAGAGAGAGCAAGAGAGATAAATAAACCCACATCTTCCTCTGAAA	9789568	chr2	9789509	+	FALSE	ENST00000478468	---	---	---	---	THC2627935
A_24_P18105	0.0203785	0.118494	8.43925	down	3.3177	4.96656	3.14925	P	P	P	7.1486	7.43759	6.75013	P	P	P	A_24_P18105	ASPH	GCTCTGTTGAAAATAATCCTTTGTCAGAAAAGAAGGTAGCTACCACATCATTTTGAAAGG	62537754	chr8	62537695	-	FALSE	ENST00000356457	444	NM_032466	aspartate beta-hydroxylase	GO:0005515|GO:0007389|GO:0005513|GO:0008285|GO:0005886|GO:0042264|GO:0005783|GO:0010524|GO:0004597|GO:0030176|GO:0097202|GO:0060316|GO:0014701|GO:0010649|GO:0032237|GO:0006936|GO:0031647|GO:0010880|GO:0060314|GO:0071277|GO:0060021|GO:0033198|GO:0008307|GO:0035108|GO:0032541|GO:0031585|GO:0005509|GO:0033018|GO:0009055|GO:0010881|GO:0033017|GO:0090316|GO:0034704|GO:0045862|GO:0044325|GO:0060325|GO:…	THC2485235
A_21_P0011885	0.00663247	0.122289	8.17738	down	3.55761	4.74502	3.48691	P	P	P	6.1476	7.22567	7.54445	P	P	P	A_21_P0011885	XLOC_l2_007829	TCCCAGATCACTTCCTCTCCTGGTTTGAGGTTTTGGGGACAAGGGAGCCTGACTAGCCCT	241874627	chr2	241874568	+	FALSE	---	---	---	---	---	---
A_22_P00025856	0.0290698	0.123154	8.11989	down	2.23749	4.12799	2.58122	A	P	A	6.12896	6.30284	6.32053	P	P	P	A_22_P00025856	LOC100132735	TCAACGAGTAACAGTGAAGACCTAGCCGTGCCTGGAGTAAATTAAGGTGATCTATGTCTC	140176102	chr6	140176043	+	FALSE	ENST00000414038	100132735	---	uncharacterized LOC100132735	---	THC2649262
A_23_P68511	0.00483972	0.123199	8.11692	down	2.15687	1.00123	2.23352	A	A	A	4.60654	4.59468	5.39551	P	P	P	A_23_P68511	ANGPT4	GTCTACTACCACGCTCCCGACAACAAGTACAAGATGGACGGCATCCGCTGGCACTACTTC	853722	chr20	853663	-	FALSE	ENST00000381922	51378	NM_015985	angiopoietin 4	GO:0030971|GO:0043066|GO:0071456|GO:0050731|GO:0005576|GO:0001525|GO:0050900|GO:0005615|GO:0045766|GO:0010595|GO:0043536|GO:0007171|GO:0030297|GO:0007596|GO:0001935|GO:0016525|GO:0043537	THC2482235
A_33_P3365932	0.0173648	0.123495	8.0975	down	3.08042	0.999877	1.8303	P	A	A	4.10915	5.56878	5.60765	P	P	P	A_33_P3365932	WASH1	CAGAGGAGAAGCTGTTTGATGCCCCCTTGTCCATCAGCAAGAGAGAGCAGCTGGAACAGC	17405	chr9	17346	-	FALSE	ENST00000354296	100287171	NM_182905	WAS protein family homolog 1	GO:0005515|GO:0034314|GO:0030335|GO:0043014|GO:0003779|GO:0006887|GO:0000145|GO:0022617|GO:0031901|GO:0071437|GO:0016197|GO:0071203|GO:0031274|GO:0042147|GO:0055037|GO:0055038|GO:0005769|GO:0031625	NP1072725
A_21_P0000336	0.0491529	0.128366	7.7902	down	1.42483	3.52464	2.28359	A	A	A	6.63029	3.96014	5.08198	P	P	P	A_21_P0000336	SNORA54	TTTCCAGCGACACATGACTGACTGACTGGTGGCTTTCAGTTTCAGGTCTTGGAGACAAAT	2985060	chr11	2985001	-	FALSE	---	677833	NR_002982	"small nucleolar RNA, H/ACA box 54"	---	THC2526961
A_22_P00002141	0.00556732	0.12885	7.76099	down	1.69267	2.63631	2.82407	A	A	P	5.1994	5.28825	5.71371	P	P	P	A_22_P00002141	---	GAAATAACCTGGATGCAAGAATCACCAAACTAACCTACTCCCACCGGCCAGACATAAAAT	31941815	chr20	31941756	+	FALSE	ENST00000420264	---	---	---	---	NP285578
A_23_P150510	0.0479334	0.130518	7.66176	down	4.73537	4.08451	4.60338	P	A	P	5.82875	7.74908	7.95622	P	P	P	A_23_P150510	MED19	GACTAAGTAAATTAGGAGAGAGAGGGACATGCTTTTGTAGGCTCATCCCAGTTGGTTTTC	57471367	chr11	57471308	-	FALSE	ENST00000337672	219541	NM_153450	mediator complex subunit 19	GO:0005515|GO:0001104|GO:0006366|GO:0006357|GO:0016592|GO:0005634	THC2474528
A_23_P107801	0.0429795	0.133753	7.47645	down	5.00654	7.6062	5.71229	P	P	P	9.01986	9.73194	9.49108	P	P	P	A_23_P107801	C19orf44	CTGCTTGAGACGTGCCGCCGTGCCACACCTTCCCTAACTTCTTCTGATGTGTCTCCATTA	16632145	chr19	16632086	+	FALSE	ENST00000221671	84167	NM_032207	chromosome 19 open reading frame 44	---	THC2464437
A_22_P00001009	0.00789661	0.134409	7.43996	down	2.81283	2.11267	2.89202	P	A	P	5.6724	6.00107	4.62268	P	P	P	A_22_P00001009	LMO7DN	ATGATTTCGCTGGAAGTGCGGTGGTGGATAAAGGGGAAGCAGGGTTACGTAATTTCACTG	76447870	chr13	76447811	+	FALSE	ENST00000318245	729420	---	LMO7 downstream neighbor	---	THC2481897
A_22_P00001601	0.0324997	0.134502	7.43482	down	2.20093	3.77133	1.42161	A	A	A	4.22528	6.01943	6.1709	P	P	P	A_22_P00001601	lnc-ARRB2-2	GAAAGTGAGAGCCAGAGAGAGACAGAAACAGGGAATGACCATTTACATATGTACACATAG	4578754	chr17	4578695	+	FALSE	---	---	---	lnc-ARRB2-2:1	---	---
A_21_P0009450	0.0138834	0.135708	7.36878	down	3.04354	4.29649	2.87168	P	A	P	6.20358	6.71715	6.33232	P	P	P	A_21_P0009450	lnc-LRRC30-1	GAGTAGCACAGAGTCTGCCCTGCACTTTTGGTGTCACCCTAATAATCCTTGGGAAAATTA	7277409	chr18	7277350	+	FALSE	---	---	---	lnc-LRRC30-1:1	---	---
A_33_P3260974	0.0289741	0.136656	7.31767	down	6.48049	8.45287	7.14107	P	P	P	10.2484	10.6632	10.4639	P	P	P	A_33_P3260974	---	AAGAAACTGGGAGACTACAGCTCAGTATAAGTAGAAATAGTGAGAGGTGACCACGGGCTA	22364066	chr9	22364007	-	FALSE	---	---	DA734158	---	---	---
A_23_P70998	0.0054326	0.137084	7.29481	down	5.59244	6.67917	5.46401	P	P	P	8.10525	9.01735	9.2945	P	P	P	A_23_P70998	UMAD1	CCTAAACATTTCATCTATATTTGTGCCTACCATGTTATAAATGTTCATAAGTACCTTCAT	7918778	chr7	7918719	+	FALSE	ENST00000406829	729852	NM_001302350	UBAP1-MVB12-associated (UMA) domain containing 1	---	THC2778042
A_21_P0004621	0.0420385	0.148526	6.73282	down	2.85925	2.93403	2.81053	P	A	P	5.09798	4.66194	6.45911	P	P	P	A_21_P0004621	---	GTGCCGGGGAGGTGTGGCTCACTAAGCTAAACTCAACCTCATCAGATAAAATAATTAGTT	169773838	chr6	169773779	-	FALSE	ENST00000440168	---	---	---	---	THC2628112
A_22_P00005032	0.0371291	0.14969	6.68049	down	4.44205	3.04854	2.00306	P	A	A	5.66853	6.51327	6.4103	P	P	P	A_22_P00005032	---	AGAGCAGAGAGCAGTGTGTGAGGAGGGAAAAAAGCCGGACTACAGGGACCCCAGCCACCC	132106599	chr12	132106540	-	FALSE	ENST00000542797	---	CN287821	---	---	---
A_22_P00002615	0.0182444	0.150044	6.66473	down	2.40152	2.60671	3.22184	P	A	P	6.27199	5.18826	4.59997	P	P	P	A_22_P00002615	LOC101929305	AATTGAGCAGGAGACAATGTAAGCAGCTGTGGGGGTGTCGAGTACTCCCTCCTGCCTGTG	201005484	chr1	201005425	+	FALSE	---	101929305	XR_241170	uncharacterized LOC101929305	---	---
A_33_P3335137	0.0176304	0.150291	6.65374	down	2.16898	2.25618	2.13468	A	A	A	4.11539	5.10931	5.28825	P	P	P	A_33_P3335137	ATG4B	CCACTGCCAGCACCCGCCGTGCCGCATGAGCATCGCGGAGCTTGACCCGTCCATCGCTGT	242608099	chr2	242608040	+	FALSE	ENST00000402096	23192	NM_013325	"autophagy related 4B, cysteine peptidase"	GO:0005515|GO:0006501|GO:0006995|GO:0045732|GO:0000422|GO:0006914|GO:0051697|GO:0005829|GO:0004197|GO:0005737|GO:0004175|GO:0016485|GO:0006612|GO:0006508|GO:0008234|GO:0000045|GO:0010508	THC2488161
A_23_P160226	0.0133806	0.150526	6.64337	down	1.49144	2.47435	1.14038	A	A	A	4.3117	4.58892	4.71795	P	P	P	A_23_P160226	MROH7	TCCCTGAGCCCCAAACCCTCCTCAGGGTGGTTGAGTTCCAGCCATGCTCCCTATAAATGT	55175922	chr1	55175863	+	FALSE	ENST00000421030	374977	NM_001039464	maestro heat-like repeat family member 7	GO:0016021|GO:0005615	NP509977
A_33_P3368540	0.00331276	0.163841	6.10347	down	3.24881	4.29669	3.93151	P	P	P	6.1264	6.43544	6.8416	P	P	P	A_33_P3368540	SRGAP3	CTTGTGTCCTACCATGGTATTTGCTAACGTTTAGAGAGTGCTTCCCCTTGCCGAGCACTG	9404584	chr3	9404525	-	FALSE	ENST00000490889	9901	XR_249341	SLIT-ROBO Rho GTPase activating protein 3	GO:0005515|GO:0051056|GO:0048365|GO:0030336|GO:0005737|GO:0007264|GO:0032855|GO:0030675|GO:0005829	THC2570914
A_23_P115467	0.0299341	0.163929	6.1002	down	5.89189	7.52289	5.55075	P	P	P	8.7017	9.47749	9.32385	P	P	P	A_23_P115467	S100A5	GGCCCTGACCACTATGGTGACCACGTTTCACAAATATTCGGGGAGAGAGGGTAGCAAACT	153512647	chr1	153512588	-	FALSE	ENST00000368717	6276	NM_002962	S100 calcium binding protein A5	GO:0005507|GO:0005509|GO:0043025|GO:0008270|GO:0005634|GO:0042803	THC2481825
A_21_P0003951	0.031504	0.165552	6.04041	down	5.24956	6.61985	4.50626	P	P	P	7.80855	8.43247	8.61276	P	P	P	A_21_P0003951	---	TGATCTTAGGGAATGAGAAAGCAAATGTGATGGAGGTGACCAAGGGGTGACAATGCTTCA	3461717	chr5	3461658	+	FALSE	ENST00000512521	---	---	---	---	---
A_21_P0005167	0.00231422	0.16602	6.02338	down	3.10297	2.4165	3.29515	P	A	P	5.01052	5.70138	5.87694	P	P	P	A_21_P0005167	---	TTTCTATGATTTAGATTCCTGGTTGCGAGAGGGAGCCTATAGGAATGGCGAGAAGAGTGA	45541196	chr6	45541137	-	FALSE	ENST00000563807	---	---	---	---	---
A_23_P33093	0.0277732	0.166966	5.98925	down	2.70651	4.639	2.78641	P	P	P	5.42257	6.14441	6.85816	P	P	P	A_23_P33093	ST6GALNAC5	ACGCCTACCAGGGGTGACAAAGCAGTGCAGTTGGATTGTAAGGAAAAATTCCGGAATTAA	77529081	chr1	77529022	+	FALSE	ENST00000318803	81849	NM_030965	"ST6 (alpha-N-acetyl-neuraminyl-2,3-beta-galactosyl-1,3)-N-acetylgalactosaminide alpha-2,6-sialyltransferase 5"	GO:0001665|GO:0009312|GO:0008373|GO:0000139|GO:0006688|GO:0016021|GO:0006488|GO:0044267|GO:0043687|GO:0018279	THC2464933
A_33_P3229067	0.0109502	0.16903	5.91611	down	2.43197	1.05406	2.18238	P	A	A	4.06719	4.82662	4.69617	P	P	P	A_33_P3229067	HIST1H2BN	AAAGTCCGCTCCTGCCCCGAAGAAAGGCTCCAAGAAGGCAGTGACAAAGGCCCAGAAGAA	27806513	chr6	27806454	+	FALSE	ENST00000396980	8341	NM_003520	"histone cluster 1, H2bn"	GO:0046982|GO:0006334|GO:0006325|GO:0005654|GO:0005634|GO:0000786|GO:0003677|GO:0070062	THC2481405
A_33_P3247210	5.34509e-05	0.171372	5.83527	down	3.53313	3.50558	3.24274	P	A	P	5.9833	5.78868	6.13996	P	P	P	A_33_P3247210	---	TTATCTTTCCCTTTTACTTAGGCAAATCACTCACCTCCCCCGAGTCCGGTCACTGCGGAG	17935268	chr2	17935209	-	FALSE	---	---	---	---	---	---
A_22_P00020980	0.0123369	0.175517	5.69746	down	4.495	5.83785	5.61794	P	P	P	7.50443	8.08852	8.13119	P	P	P	A_22_P00020980	lnc-C7orf45-1	AGATCAGCAGGCGCGGAACTCCCACAACCCGCGTAGATTCCAAGACAGGAAGCACAAACA	129845195	chr7	129845136	+	FALSE	---	---	DB046182	lnc-C7orf45-1:1	---	---
A_21_P0000258	0.0184545	0.178066	5.61589	down	4.26408	5.93595	4.55122	P	P	P	7.07276	7.34627	8.16005	P	P	P	A_21_P0000258	SNORD26	TACGAACTGAACTCTCTCTTTCTGATGGATTAGTGGAGAAAACAGAAAATTCTGAGTAGC	62622823	chr11	62622764	-	FALSE	---	9302	NR_002564	"small nucleolar RNA, C/D box 26"	---	THC2538319
A_33_P3325643	0.0115379	0.182937	5.46636	down	2.2919	3.31174	1.95408	A	A	A	4.66731	5.10981	5.40217	P	P	P	A_33_P3325643	LINC00487	TGCCGTCTGGAAGATGCGCCGTGCCGGTTCTACACGGTGTTCCCTTGCTCCAGGCAGAAA	6910270	chr2	6910211	-	FALSE	ENST00000382045	400941	---	long intergenic non-protein coding RNA 487	---	THC2480003
A_33_P3399181	0.0262985	0.183942	5.4365	down	3.62931	5.1671	3.91049	P	P	P	6.9683	6.92248	6.61228	P	P	P	A_33_P3399181	---	GCGCTGCATGAGCCTCCCGGGCGGCCCGGTGGAGAGAGTCGCCGCCAGCCCCGGCCGCGC	4643191	chr17	4643132	+	FALSE	---	---	---	---	---	---
A_23_P132057	0.0317229	0.186527	5.36115	down	2.48615	4.23321	2.28848	A	A	A	6.13619	5.77049	5.00603	P	P	P	A_23_P132057	LINC00158	AAACCCAGCAGAAGAGAAAGTTTAAGAAAGCGGTCGTCGCCAATACCAAAATTAGCTATG	26758626	chr21	26758567	-	FALSE	ENST00000332587	54072	NR_024027	long intergenic non-protein coding RNA 158	---	NP411921
A_33_P3268284	0.0448087	0.187266	5.34	down	2.98103	1.03536	3.24393	P	A	P	4.20006	5.09212	5.67826	P	P	P	A_33_P3268284	GDI2	TACATTGCCATAGTTAGTACGACTGTGGAAACCAAGGAGCCTGAGAAGGAAATCAGACCA	5808548	chr10	5808489	-	FALSE	ENST00000445131	2665	NM_001494	GDP dissociation inhibitor 2	GO:0005515|GO:0051056|GO:0005794|GO:0031267|GO:0007264|GO:0032851|GO:0015031|GO:0031982|GO:0005829|GO:0007165|GO:0005737|GO:0016020|GO:0005093|GO:0016192|GO:0005925|GO:0005097|GO:0070062	THC2566791
A_33_P3319041	0.038807	0.189257	5.28383	down	3.58784	3.46715	2.94922	P	A	P	6.58628	4.84237	5.24791	P	P	P	A_33_P3319041	HMGB3	GTATTTGGGGACGTTGGATGCATTCATTTTCTGTAATAAAGTTTCTTAATCACTCTTCCC	150159239	chrX	150159180	+	FALSE	ENST00000325307	3149	NM_001301228	high mobility group box 3	GO:0045578|GO:0006355|GO:0003690|GO:0045638|GO:0008301|GO:0005694|GO:0003682|GO:0007275|GO:0006338|GO:0006310|GO:0005634	THC2602416
A_22_P00020897	0.0443916	0.189265	5.28361	down	2.77912	5.02028	3.28839	P	P	P	6.72823	6.55059	5.89716	P	P	P	A_22_P00020897	lnc-RPP38-2	GTGTATTTTAAAAGGCCTTTGGGAATTTTCTATTCTGCCTGGCCCACTCCTACTACAGAT	15213418	chr10	15213359	+	FALSE	---	---	CR749680	lnc-RPP38-2:1	---	THC2542716
A_21_P0002876	0.00444763	0.192719	5.18889	down	1.9243	2.95888	2.17209	A	A	A	4.26032	4.97615	5.03497	P	P	P	A_21_P0002876	lnc-RP11-723O4.6.1-1	CTCTCGCCGCCCTGTAGCCGTAGAACACATTTCTGGAAGATGAAGAAAAACCTGCTTCTC	128719910	chr3	128719477	-	FALSE	---	---	---	lnc-RP11-723O4.6.1-1:1	---	---
A_22_P00002137	0.0404247	0.194107	5.15179	down	6.06989	7.94477	6.90003	P	P	P	9.413	9.59242	9.60178	P	P	P	A_22_P00002137	lnc-BPHL-1	ATGAAGCTAGCGCAATAAATATGACCGTACCCCCGACCCAAGTTTCTGAGACAAATACAC	3157384	chr6	3157325	+	FALSE	---	---	---	lnc-BPHL-1:1	---	---
A_24_P226008	0.0345291	0.195126	5.12489	down	6.78745	8.62023	7.20907	P	P	P	9.7723	10.201	10.3326	P	P	P	A_24_P226008	MGLL	GACAAGACTCTCAAGATTTATGAAGGTGCCTACCATGTTCTCCACAAGGAGCTTCCTGAA	127413832	chr3	127411122	-	FALSE	ENST00000476682	11343	NM_007283	monoglyceride lipase	GO:0019369|GO:0006629|GO:0005886|GO:0045202|GO:0060292|GO:0044281|GO:2000124|GO:0042803|GO:0008289|GO:0030516|GO:0006954|GO:0004622|GO:0043196|GO:0047372|GO:0006633|GO:0019433|GO:0046464|GO:0050727|GO:0030168|GO:0009966|GO:0007596|GO:0005789|GO:0005654|GO:0036155|GO:0006644|GO:0046474|GO:0051930	THC2534201
A_22_P00017616	0.0167601	0.19701	5.07589	down	2.1253	3.51423	2.07693	A	A	A	4.38181	5.4848	5.1671	P	P	P	A_22_P00017616	TOB1-AS1	TTATTCCAAATGTCCCAGCCCACGCCGTGCCCAGAGTGTGGCGACACGAGGCCAAACTGC	48944578	chr17	48944519	+	FALSE	---	400604	NR_038458	TOB1 antisense RNA 1	---	THC2507877
A_21_P0008357	0.0089014	0.197528	5.06257	down	2.92109	4.18418	3.23493	P	P	P	5.94501	6.25079	5.33204	P	P	P	A_21_P0008357	lnc-C14orf118-1	AGTTCTGTTGTGACAGCCCTTGACAGCAGGTGTCTGTCATCTCCCCCATTCTATCCCCTC	76731208	chr14	76731149	+	FALSE	---	---	---	lnc-C14orf118-1:3	---	---
A_23_P301995	0.0210243	0.197863	5.054	down	1.94326	3.53543	2.09135	A	A	A	4.6395	5.65369	4.60338	P	P	P	A_23_P301995	LIN9	CCTCCTCTCCAGTCACCAATTATAGATAATGATCCTTTATTAGGACAGTCGCCGTGGAGA	226453937	chr1	226453300	-	FALSE	ENST00000328205	286826	NM_173083	lin-9 DREAM MuvB core complex component	GO:0005515|GO:0071897|GO:0017053|GO:0000086|GO:0051726|GO:0005654|GO:0000278|GO:0006351	THC2484578
A_22_P00003512	0.0445628	0.200956	4.97622	down	4.07936	5.97865	4.48169	P	P	P	7.2507	7.38838	7.56428	P	P	P	A_22_P00003512	lnc-CCL1-1	CTCCTCCAACCCCACTCCCAGCACATACACATGAAAGAAAATAAAGAAAAAGAAAAAACA	32445425	chr17	32445366	-	FALSE	---	---	BX106859	lnc-CCL1-1:1	---	THC2638704
A_22_P00014771	0.0326403	0.203244	4.9202	down	2.77168	4.74177	3.25613	P	P	P	5.40918	6.39557	6.419	P	P	P	A_22_P00014771	lnc-SLC36A4-1	AAGGCAGTATTAAACTGTCTGCCCTTAATGTCATTACATGTGGTTTCTCTTATTTGACCT	92481960	chr11	92481901	-	FALSE	---	---	DB164272	lnc-SLC36A4-1:1	---	---
A_22_P00025529	0.00073332	0.205739	4.86053	down	2.45947	2.3344	2.49528	P	A	P	4.62979	4.54649	4.932	P	P	P	A_22_P00025529	lnc-KRTAP5-6-3	TGAACCCACTCCTTGTTCCAAGGAAGCTCCCCTGGGCTTTTAATCACTTAAATAAAACCT	1783689	chr11	1783630	+	FALSE	---	---	AL832075	lnc-KRTAP5-6-3:1	---	THC2535544
A_22_P00010666	0.026927	0.205906	4.85659	down	2.81971	4.34719	3.31751	P	P	P	6.09421	5.93595	5.70083	P	P	P	A_22_P00010666	lnc-NEO1-1	AGACTTGAAATGAGAACTCTTACAAAACCACACCAGAGCACAGCCCACCTCCCTTCTCTT	73627908	chr15	73627849	+	FALSE	---	---	---	lnc-NEO1-1:2	---	THC2726250
A_33_P3213134	0.0416524	0.207445	4.82057	down	4.5246	6.31886	4.91234	P	P	P	7.54996	7.84431	7.80565	P	P	P	A_33_P3213134	---	CCCAACCAGATGATGCCCCCGATTCTGTGGAGCCCAGATTACCACTTCCCTGACCCTCAG	105059190	chr14	105059131	+	FALSE	---	---	---	---	---	---
A_23_P162322	0.0456732	0.207513	4.81898	down	5.21656	7.1486	5.93163	P	P	P	8.50884	8.52192	8.73209	P	P	P	A_23_P162322	WNT10B	TTTGGAGCCATAAGATCTGTATCTAGAAAGAGATCACCCACTCCTATGTACTATCCCCAA	49359496	chr12	49359437	-	FALSE	ENST00000301061	7480	NM_003394	"wingless-type MMTV integration site family, member 10B"	GO:0071464|GO:0006629|GO:0008284|GO:0071300|GO:0045599|GO:0045899|GO:0090263|GO:0050680|GO:0032434|GO:0005615|GO:0007224|GO:0005109|GO:0051091|GO:0030858|GO:0050909|GO:0002062|GO:0071374|GO:0000086|GO:0030182|GO:0007050|GO:0016055|GO:0060070|GO:0014835|GO:0048018|GO:0030501|GO:0043065|GO:0050821|GO:0005578|GO:0048741|GO:0005576|GO:0000122|GO:0051885|GO:0048641|GO:0045669|GO:0071425|GO:0010971|GO:…	NP1456377
A_32_P34876	0.0417598	0.210194	4.75751	down	1.07163	3.17731	2.25001	A	A	A	4.75754	4.13726	4.95516	P	P	P	A_32_P34876	WDR93	GGCCTGCCCACTCCTGGAAAATATCTCAAAAAATTGTACCATTCCTCAAAGGGACTTGGA	90281404	chr15	90281345	+	FALSE	ENST00000444934	56964	NM_020212	WD repeat domain 93	GO:0016651|GO:0022900	NP498805
A_23_P373119	0.00638283	0.212909	4.69685	down	3.77133	3.9259	3.20807	P	P	P	6.45215	5.52319	5.50399	P	P	P	A_23_P373119	HMGB3P1	AAGCTGAAGAAGTATGAGAAGGATGTTGCTGACTATAAGTCGAAAGGAAAGTTGGACGGC	33421521	chr20	33421462	-	FALSE	ENST00000393368	128872	NR_002165	high mobility group box 3 pseudogene 1	---	NP798948
A_21_P0009528	0.00510486	0.213465	4.6846	down	2.87861	3.59858	2.72688	P	A	A	5.49199	5.0657	5.45017	P	P	P	A_21_P0009528	lnc-PIEZO2-3	CTGCTTTCAAATAAAATGTGCCATCTGAAGGAGCACAGTTTCCACTCCAGACCTGCATGT	11366828	chr18	11366769	-	FALSE	---	---	---	lnc-PIEZO2-3:3	---	---
A_21_P0008252	0.0163249	0.214536	4.66122	down	1.975	3.10101	2.92173	A	A	P	4.7751	4.96819	5.12748	P	P	P	A_21_P0008252	lnc-TSC22D1-1	ATTCCTACTTTTAAGAACTCCCCACGCCCGTCCTAAGTGATTGTGATTCCCAGTAAGTGA	44974260	chr13	44974201	-	FALSE	---	---	---	lnc-TSC22D1-1:4	---	---
A_22_P00016555	0.0122751	0.217486	4.598	down	4.28038	5.60834	4.66345	P	P	P	6.56427	7.14565	7.59955	P	P	P	A_22_P00016555	lnc-TNFRSF10A-1	TCAACTCCCGACCGAGAAGCCTGGCGCTGGGACCAAGTGGCAAAACGACTCCGAATGCAG	23082835	chr8	23082776	-	FALSE	---	---	---	lnc-TNFRSF10A-1:1	---	---
A_22_P00003135	0.00218812	0.219695	4.55177	down	3.26756	3.74166	3.07695	P	A	P	5.16678	5.4894	5.96084	P	P	P	A_22_P00003135	lnc-C9orf147-1	AGGATAATGTATGTTACACTGTACCCACTCCGTTAAGCACAATAAATCTCCTTTTTCTTG	115196155	chr9	115196096	-	FALSE	---	---	---	lnc-C9orf147-1:1	---	---
A_33_P3249877	0.034321	0.223405	4.47617	down	6.67808	8.43461	7.76565	P	P	P	9.70659	9.80485	10.2891	P	P	P	A_33_P3249877	BEST3	ATAAAAATCCCACTCCCTCAGCCTCAATTCCAGTGTGCTAAGAGTGATCCTGGTGGTTAA	70037530	chr12	70037471	-	FALSE	ENST00000331471	144453	NM_001282614	bestrophin 3	GO:0043271|GO:0008150|GO:0003674|GO:0005886|GO:0034707|GO:0005254	NP501031
A_23_P143906	0.0462668	0.224137	4.46156	down	3.06591	3.31272	5.12494	P	A	P	6.25317	6.85816	5.49464	P	P	P	A_23_P143906	MLF1	ACATGGAAGGAGATCAAATGTTTTGGGGGACAAACTCCACATCAAAGGCTCATCTGTGAA	158322975	chr3	158322916	+	FALSE	ENST00000619577	4291	NM_022443	myeloid leukemia factor 1	GO:0005515|GO:0005737|GO:0019904|GO:0007050|GO:0005654|GO:0005634|GO:0002318|GO:0003677|GO:0006351	NP1465044
A_33_P3324786	0.0133197	0.224654	4.4513	down	2.60186	3.53471	2.50215	P	A	P	4.91107	5.08665	5.31322	P	P	P	A_33_P3324786	TCFL5	ATTTGAAGTTTCTATCTGGGCTCATTTCCAGCTGTTCAGGGTTCGGATTCCTGAAGGCTT	61477326	chr20	61477267	-	FALSE	ENST00000217162	10732	XM_005260184	transcription factor-like 5 (basic helix-loop-helix)	GO:0006355|GO:0003700|GO:0006366|GO:0042127|GO:0046983|GO:0045595|GO:0007275|GO:0005634|GO:0007283|GO:0001673|GO:0003677|GO:0030154	THC2650323
A_21_P0003216	0.0121377	0.225658	4.43148	down	7.85503	8.57057	7.52618	P	P	P	10.0324	10.158	10.3858	P	P	P	A_21_P0003216	LOC101927440	TCACTGCAAGCAAAAAGGGGAAGAAACGCTCACAAAAGGGAAGGCAGCAGGAAAAGTAAT	9291498	chr3	9291439	+	FALSE	---	101927440	XR_249342	uncharacterized LOC101927440	---	---
A_22_P00013941	0.0161809	0.226143	4.42198	down	3.39418	4.48419	3.93337	P	P	P	5.25917	6.57543	6.31019	P	P	P	A_22_P00013941	lnc-RRP8-1	AGCTTTATCCTCTACAGGAGAGAAGTGTTTGTGTTGGGGGTAGGGGGCCTGAGCTGCGTC	6625420	chr11	6625361	-	FALSE	---	---	BI762183	lnc-RRP8-1:1	---	---
A_33_P3312030	0.0185226	0.231051	4.32805	down	7.00894	7.21615	6.06912	P	P	P	9.46662	9.00155	8.08475	P	P	P	A_33_P3312030	---	ACAGCTCCGCTGCCCGCTGAACTCCATCCTCCCGGCGGTCGGGCGGCGGCGGCTGCGGTC	158559048	chr4	158558989	+	FALSE	ENST00000507296	---	---	---	---	---
A_33_P3336484	0.0139379	0.232674	4.29786	down	2.69551	3.80773	2.63586	P	A	P	5.41076	4.52917	5.61794	P	P	P	A_33_P3336484	NPIPA5	GGCAGGTGTCAGAGGCAGAGGAAAATGGGAAATTGGATATGAAAGAAATACACACCTACA	15460570	chr16	15460511	-	FALSE	ENST00000283050	100288332	NM_001277325	"nuclear pore complex interacting protein family, member A5"	---	THC2506214
A_23_P99632	0.027402	0.236182	4.23402	down	3.76281	5.10237	3.73794	P	P	P	6.22574	6.26735	6.74882	P	P	P	A_23_P99632	RNF31	CAGGCACACTACAAAGAGTATCTTGTGAGCCTCATCAATGCCCACTCGCTGGACCCAGCC	24629505	chr14	24629168	+	FALSE	ENST00000559449	55072	NM_017999	ring finger protein 31	GO:0000209|GO:0005515|GO:0035631|GO:0043130|GO:0050852|GO:0004842|GO:0016874|GO:0023035|GO:0071797|GO:0097039|GO:0005737|GO:0051092|GO:0009898|GO:0008270|GO:0043123|GO:0031625	THC2570678
A_33_P3236267	0.00522772	0.239239	4.17992	down	3.38205	3.46528	3.83071	P	A	P	5.88169	5.09179	5.81133	P	P	P	A_33_P3236267	LINC00504	CAAAGCAGTGTGTACAGGGAAATTTATAGCACTAAATGCCCACAAGAGAAAGCAGGAAAG	14475981	chr4	14475922	-	FALSE	ENST00000515031	201853	NR_126435	long intergenic non-protein coding RNA 504	---	NP851933
A_33_P3211809	0.0290504	0.240918	4.15078	down	2.74511	3.66835	2.0884	P	A	A	4.82023	5.36335	4.84991	P	P	P	A_33_P3211809	RUNX1	TTCACAAACCCACCGCAAGTCGCCACCTACCACAGAGCCATCAAAATCACAGTGGATGGG	36231846	chr21	36231787	-	FALSE	ENST00000467577	861	NM_001122607	runt-related transcription factor 1	GO:0005515|GO:0003700|GO:0071560|GO:0005634|GO:0042803|GO:0043231|GO:0031069|GO:2000872|GO:0071336|GO:0005737|GO:0045944|GO:0030854|GO:0070491|GO:0030099|GO:0030853|GO:0035162|GO:0030097|GO:0000975|GO:0000977|GO:0046982|GO:0005509|GO:0060216|GO:0009966|GO:0001228|GO:0007417|GO:0005524|GO:0003677|GO:0001701|GO:0045766|GO:0006351|GO:0005604|GO:0001889|GO:0071425|GO:0001501|GO:0048935|GO:0005654|GO:…	NP089985
A_23_P157449	0.0227635	0.241264	4.14483	down	4.639	4.60408	4.27681	P	P	P	6.59484	7.03905	5.81373	P	P	P	A_23_P157449	POLR2K	GGTCTCTCTTGCTTCAAAATATCTTCTTGTACAGTACTCACCATTTTAGATGTGGTTGAC	101165907	chr8	101165845	+	FALSE	ENST00000353107	5440	NM_005034	"polymerase (RNA) II (DNA directed) polypeptide K, 7.0kDa"	GO:0008380|GO:0010467|GO:0006386|GO:0006368|GO:0006367|GO:0006385|GO:0006366|GO:0006363|GO:0006362|GO:0006361|GO:0005634|GO:0006360|GO:0006383|GO:0005829|GO:0005736|GO:0034587|GO:0005665|GO:0016032|GO:0005666|GO:0032481|GO:0035019|GO:0006356|GO:0006370|GO:0003677|GO:0050434|GO:0006281|GO:0006283|GO:0001056|GO:0000398|GO:0045814|GO:0045087|GO:0001055|GO:0001054|GO:0040029|GO:0008270|GO:0005654|GO:…	THC2467990
A_33_P3226542	0.0058964	0.242829	4.11812	down	5.40782	5.10272	5.07401	P	P	P	6.89625	7.6712	7.04555	P	P	P	A_33_P3226542	SNORD3B-1	TGATGATCGTTCTTCTCTCCGTATTGGGGAGTGAGAGGGAGAGAACGCGGTCTGAGTGGT	18965441	chr17	18965382	+	FALSE	ENST00000580533	26851	NR_003271	"small nucleolar RNA, C/D box 3B-1"	---	THC2567949
A_23_P205713	0.0191699	0.248663	4.02151	down	1.66891	2.95407	2.74591	A	A	P	5.11689	3.93151	4.39023	P	P	P	A_23_P205713	STXBP6	GCACAAGCTTGCCATGAAGCACAAATGTTGAGAAACTGCCTATCCTGGTGACTCTTCTTA	25288249	chr14	25281886	-	FALSE	ENST00000548369	29091	NM_014178	syntaxin binding protein 6 (amisyn)	GO:0045920|GO:0005737|GO:0035542|GO:0016021|GO:0016192	THC2488293
A_23_P131149	0.0279954	0.252488	3.96058	down	3.60544	2.6634	2.30911	P	A	A	4.77976	5.02407	5.04079	P	P	P	A_23_P131149	ORC4	AATTAATAAAGCCCATGGAAAGAACTTCAGGAAATTCACAGAGAGAGTACCAGCTGATGA	148693242	chr2	148693183	-	FALSE	ENST00000392857	5000	NM_002552	"origin recognition complex, subunit 4"	GO:0005515|GO:0000808|GO:0005730|GO:0005634|GO:0003688|GO:0015629|GO:0005524|GO:0006260|GO:0000082|GO:0005737|GO:0000166|GO:0006270|GO:0005654|GO:0005664|GO:0000278	THC2617418
A_32_P212095	0.0497319	0.253411	3.94616	down	3.67768	5.73615	4.31219	P	P	P	7.01081	6.10934	7.14192	P	P	P	A_32_P212095	C17orf105	AAGACACTCCCGACTGGCTGAATGCTCCATCTTCAGATGCTTCAATAAAGCTTGGAACAT	41861872	chr17	41861813	+	FALSE	ENST00000590148	284067	NM_001136483	chromosome 17 open reading frame 105	---	THC2582643
A_33_P3315986	0.0420533	0.253647	3.94248	down	1.65438	3.45049	2.82331	A	A	P	4.98308	4.96446	4.36219	P	P	P	A_33_P3315986	---	AACGGAACTGACAAAACCCAGCGAAACTGACCAGAAAGGCTGCGGCGACCCCGATCCTTT	20344517	chr20	20344458	-	FALSE	---	---	---	---	---	---
A_33_P3218118	0.0443232	0.254029	3.93655	down	2.1622	4.007	2.8218	A	A	P	4.86305	5.52757	5.06671	P	P	P	A_33_P3218118	---	ATGGGCCTGGGGCTCAGCCTGTGGTTCTGTCAACCGTGGGCGACCCTCCATGTGAAATAA	19019100	chr22	19019041	-	FALSE	---	---	---	---	---	---
A_21_P0000369	0.031678	0.265067	3.77262	down	5.75858	6.7566	7.017	P	P	P	9.19773	7.73402	8.2321	P	P	P	A_21_P0000369	SNORA16A	CTTGACGGTCGCCGTTCTGTTTGTTGTAACTGATCTGCAACATTTTGGGAAAATACAGTT	28907491	chr1	28907432	-	FALSE	---	692073	NR_003035	"small nucleolar RNA, H/ACA box 16A"	---	THC2619997
A_22_P00004473	0.0273542	0.266007	3.75929	down	2.87601	3.89958	2.52538	P	A	A	5.2969	5.24956	4.80685	P	P	P	A_22_P00004473	LOC100129917	AGAGGCGCTGGAGCTGGGTCAGTCCGCCGCTCACCCCGCGGCCGCACCTTCCCGCCTTCT	775622	chr4	775563	-	FALSE	---	100129917	NR_036512	uncharacterized LOC100129917	---	THC2474955
A_22_P00003109	0.0488173	0.266881	3.74699	down	9.13209	9.2346	7.51816	P	P	P	11.0908	10.7184	10.2054	P	P	P	A_22_P00003109	lnc-C9orf103-1	GGACCGCCGCTTTCACCACTCTCGGCCATGGCTGTGGCGGCGGCGGCGGCGGTGACTCAG	86322625	chr9	86322566	+	FALSE	---	---	---	lnc-C9orf103-1:1	---	THC2657897
A_33_P3393370	0.0310209	0.268219	3.72829	down	2.85186	3.51722	2.85794	P	A	P	4.25974	5.67993	4.71206	P	P	P	A_33_P3393370	---	CGGGACCCAAGACTCTCCACGCGGCTCACCCACCAGGCCCAGGAGGCGACCCGAACCTGA	1072739	chr16	1072680	-	FALSE	---	---	---	---	---	---
A_33_P3355055	0.0497313	0.26871	3.72149	down	4.50224	5.45017	4.30221	P	P	P	6.93967	7.23238	5.56461	P	P	P	A_33_P3355055	ARL6IP4	AAAGAAGAAGAGCAGGAAAGACACCTCGAGGAACTGCTCGGCCTCCACATCCCAAGGTCG	123465817	chr12	123465758	+	FALSE	ENST00000442210	51329	NM_001278378	ADP-ribosylation factor-like 6 interacting protein 4	GO:0008380|GO:0006397|GO:0005515|GO:0016607|GO:0005730|GO:0005634	NP434144
A_24_P67681	0.00583838	0.269262	3.71386	down	5.22845	5.05597	4.43937	P	P	P	7.2984	6.48506	6.59046	P	P	P	A_24_P67681	---	TCTATAAGTCGAAAGGAAAGTCTGATGGCGCAAAGGGTCCTGCTAAAGTTGCCCAGAAAA	40800727	chr17	40800668	+	FALSE	ENST00000589177	---	---	---	---	---
A_33_P3383606	0.0358734	0.270097	3.70237	down	3.40133	4.15881	4.00659	P	A	P	5.05289	5.37094	6.49476	P	P	P	A_33_P3383606	KCP	AGCCTGGGCCCCTGCCCTGCAAAGACCCCCGCCATGTTGAGTCACCAGCAGTAAACTCTA	128516990	chr7	128516931	-	FALSE	ENST00000610776	375616	NM_001135914	kielin/chordin-like protein	GO:0005576	THC2609353
A_24_P315500	0.00117578	0.272442	3.67051	down	4.58035	4.113	4.19299	P	A	P	6.32053	6.34952	5.83267	P	P	P	A_24_P315500	NFYC-AS1	TCAGGAGTCCAGGAAGAGCAGGAGCCGCCCCCGCGCTCCTACGGAGTCGGGCAATGCAGA	41157533	chr1	41157474	-	FALSE	---	100130557	NR_024567	NFYC antisense RNA 1	---	THC2476747
A_21_P0009597	0.0300537	0.278008	3.59702	down	2.46507	3.62601	2.65672	A	A	P	4.96819	4.78509	4.81149	P	P	P	A_21_P0009597	LOC102723376	GGAAAATGGGCAATGAAAACCCCTCCCTAACTGGCTTCTCAGTCCACTCTGACCAGCCCA	13326	chr18	13267	+	FALSE	ENST00000572573	102723376	NR_110795	uncharacterized LOC102723376	---	THC2681754
A_19_P00800264	0.0194809	0.282179	3.54385	down	4.16466	3.61107	3.88865	P	A	P	5.0129	5.82257	6.1389	P	P	P	A_19_P00800264	OTUD6B-AS1	GTCACTGTATTTGCCCCTTTATGTCAATTACCTATTATAAACCGAGAGAAATGGGAAAAT	92075826	chr8	92075767	-	FALSE	---	100506365	---	OTUD6B antisense RNA 1 (head to head)	---	THC2663356
A_22_P00002540	0.031146	0.283053	3.53291	down	9.32581	8.58761	7.76965	P	P	P	10.8792	10.5447	9.99441	P	P	P	A_22_P00002540	lnc-C17orf62-1	TCCGCTTCTCGTGGGTCCTGCGGCGGCGGCGGCGGCCAAGCGGCGTTCACCAGGGAGTCG	80416352	chr17	80416293	-	FALSE	---	---	GR564636	lnc-C17orf62-1:1	---	---
A_33_P3404418	0.0258735	0.284785	3.51142	down	2.90026	4.12298	2.93819	P	A	P	5.32806	4.8657	5.49134	P	P	P	A_33_P3404418	MAP3K6	GAAGAGCTGCTGCGCTGCCTCGGGGCACACATCCACACTCCCAACCGCCGGCAGCTCGCC	27684040	chr1	27683981	-	FALSE	ENST00000495230	9064	NM_004672	mitogen-activated protein kinase kinase kinase 6	GO:0007165|GO:0005737|GO:0000186|GO:0000287|GO:0006468|GO:0007257|GO:0005524|GO:0004709	THC2680528
A_21_P0002044	0.0447947	0.286054	3.49584	down	3.41472	5.09798	3.69056	P	P	P	6.46384	6.06427	5.55336	P	P	P	A_21_P0002044	lnc-SIX2-3	ATCTGATTGTGTAATGAAATATGTATGAGGAACAGCTGTTTGCAACAGTCCCCTCCCGCC	45157147	chr2	45157088	-	FALSE	---	---	---	lnc-SIX2-3:4	---	THC2646147
A_33_P3237552	0.0206892	0.286071	3.49564	down	2.59887	3.73547	3.22737	P	A	P	4.88309	5.02588	5.26257	P	P	P	A_33_P3237552	FIBCD1	CCTCACTCTTTCGTGAATGTTCTCCACCCACCTGTGCCTGGCGGACCCACTCTCCAGTAG	133779394	chr9	133779335	-	FALSE	ENST00000372338	84929	NM_032843	fibrinogen C domain containing 1	GO:0008061|GO:0016020|GO:0016021|GO:0046872	THC2474476
A_24_P318134	0.0297791	0.286374	3.49193	down	2.23567	3.52519	2.20617	A	A	A	4.60875	4.15107	4.93532	P	P	P	A_24_P318134	ZC3H10	TGTATCGATGGCCCAACCCTTGGCAGGAATCACAATGAGCCACACCACCACTCCCATGGT	56515599	chr12	56515540	+	FALSE	ENST00000257940	84872	NM_032786	zinc finger CCCH-type containing 10	GO:0005515|GO:0046872	THC2463863
A_22_P00022471	0.0288921	0.287052	3.48369	down	3.39112	4.10409	2.97489	P	A	P	5.317	5.38723	5.39679	P	P	P	A_22_P00022471	---	TGCCCACCCCCACCTAAACTCATGTCCTCACACACAAAATACATTCGTTGCTTCCCAGTA	33025830	chr5	33025771	+	FALSE	ENST00000511054	---	---	---	---	THC2719188
A_22_P00001792	0.0360966	0.287842	3.47413	down	3.88124	5.15276	3.93902	P	P	P	6.43787	6.04585	6.23472	P	P	P	A_22_P00001792	---	GGATCTCCCCCACCACCCCAACTCCAGTGAGCTTTCAGATGAGATTGTAGCCCCAGATGA	50864715	chr14	50864656	+	FALSE	ENST00000556713	---	BQ082534	---	---	---
A_22_P00014212	0.0184034	0.287891	3.47353	down	1.99415	3.20049	2.68991	A	A	P	4.10356	4.15269	5.05336	P	P	P	A_22_P00014212	LOC101928323	ATCCGAACAGAAAAGGCTTCCACCCGCTCCCCTGAGGGATCCCACGCTGAGGGACTGAAC	42695605	chr3	42695546	-	FALSE	---	101928323	NR_125400	uncharacterized LOC101928323	---	THC2544586
A_33_P3365676	0.0383056	0.291542	3.43004	down	4.61627	4.37026	4.17963	P	P	P	5.44631	6.77971	5.99427	P	P	P	A_33_P3365676	PTPLAD1	CTTAGTGATTGTTACAAACCCCTTTATTGCTGTCTGAGAAAGTGAAAGATTGTGTATTTC	65870664	chr15	65870605	+	FALSE	ENST00000261875	51495	NM_016395	protein tyrosine phosphatase-like A domain containing 1	GO:0005515|GO:0005783|GO:0007264|GO:0030497|GO:0007249|GO:0007257|GO:0007266|GO:0043547|GO:0016601|GO:0005789|GO:0016021|GO:0019899|GO:0042761|GO:0005925|GO:0018812|GO:0005096	THC2470149
A_33_P3401284	0.00928723	0.293266	3.40987	down	4.30068	4.99023	4.3163	P	P	P	5.79392	6.30564	6.76724	P	P	P	A_33_P3401284	RMRP	TGTATCCTAGGCTACACACTGAGGACTCTGTTCCTCCCCTTTCCGCCTAGGGGAAAGTCC	35657998	chr9	35657939	-	FALSE	ENST00000602361	6023	NR_003051	RNA component of mitochondrial RNA processing endoribonuclease	---	THC2562508
A_22_P00023963	0.0323468	0.293363	3.40875	down	2.64157	3.44943	2.04289	P	A	A	4.45145	4.41066	4.8781	P	P	P	A_22_P00023963	lnc-CCDC90A-6	CAGGACTACCCACTTCCCTTGGAATGGTGTTGCCATCACTGTTCTGGCACCGGAGGTAAG	14599916	chr6	14599857	-	FALSE	---	---	---	lnc-CCDC90A-6:1	---	---
A_33_P3268900	0.0193274	0.296036	3.37797	down	3.69953	4.67375	4.81326	P	P	P	6.5771	5.57759	6.35474	P	P	P	A_33_P3268900	BNIP3L	GCGCTAAACATGGAAAGGAACAACTGGTACCAGCCGCTGCAAAATCATGCCAAAATGTAA	26255047	chr8	26254988	+	FALSE	---	665	AF370457	BCL2/adenovirus E1B 19kDa interacting protein 3-like	GO:0005515|GO:0043066|GO:0043065|GO:0046982|GO:0005783|GO:0035694|GO:0005741|GO:0031224|GO:0005635|GO:0042803|GO:0042802|GO:0005739|GO:0051607|GO:0016032|GO:0016021|GO:0005521	THC2493644
A_32_P216602	0.040367	0.298006	3.35564	down	5.01343	5.93837	4.55932	P	P	P	7.15277	6.88989	7.04864	P	P	P	A_32_P216602	lnc-NAV1-3	GGTCCCACTGTGCGCCCTGTCGCCGCCACCGCGGAAAACGTCTTGCACGTGCGAGGGGCA	201476523	chr1	201476464	+	FALSE	---	---	DB229023	lnc-NAV1-3:1	---	THC2545510
A_33_P3323298	0.0260162	0.298254	3.35285	down	3.19948	2.13574	3.42652	P	A	P	5.1393	4.84622	4.13552	P	P	P	A_33_P3323298	JUN	CTTCCAATTTGGAATCTTCTCTTTGACAATTCCTAGATAAAAAGATGGCCTTTGCTTATG	59246570	chr1	59246511	-	FALSE	ENST00000371222	3725	NM_002228	jun proto-oncogene	GO:0005515|GO:0042542|GO:0003700|GO:0001190|GO:0006366|GO:0003705|GO:0000981|GO:0002756|GO:0043524|GO:0043525|GO:0003690|GO:0002755|GO:0017053|GO:0032496|GO:0007179|GO:0007612|GO:0001102|GO:0038124|GO:0038123|GO:0005719|GO:0034134|GO:0003713|GO:0007568|GO:0002224|GO:0043922|GO:0043392|GO:0001889|GO:0032321|GO:0007184|GO:0007623|GO:0035666|GO:0034166|GO:0005654|GO:0000980|GO:0019899|GO:0038095|GO:…	THC2469957
A_22_P00010751	0.00549726	0.298368	3.35157	down	10.4376	9.99441	9.63446	P	P	P	12.2037	11.6129	11.4927	P	P	P	A_22_P00010751	YTHDF3	GCGGCGGCGGCGGCGGCTCTCGGGTTGCGGTGAAGAATGTCAGCCACTAGCGTGGATCAG	64081460	chr8	64081401	+	FALSE	ENST00000522282	253943	NM_001277816	YTH N(6)-methyladenosine RNA binding protein 3	GO:0005515	THC2781383
A_24_P303874	0.0259615	0.30024	3.33066	down	5.52255	6.13619	4.78509	P	P	P	7.51692	7.47127	6.88989	P	P	P	A_24_P303874	C9orf62	TTAAGGGAGCCGCCACCGCCCCAATGGGGTTGGTTTCTTTCTTCCCTGTTTTTAAAGATC	138236247	chr9	138236188	+	FALSE	ENST00000320778	157927	NM_173520	chromosome 9 open reading frame 62	---	THC2486045
A_24_P318967	0.00442388	0.301027	3.32196	down	3.786	3.24342	4.00259	P	A	P	5.10306	5.72362	5.43694	P	P	P	A_24_P318967	PDXK	CCCAATAACCTCAAGGTGGCCTGTGAGAAGACCGTGTCTACCTTGCACCACGTTCTGCAG	45175623	chr21	45173586	+	FALSE	ENST00000398078	8566	NM_003681	"pyridoxal (pyridoxine, vitamin B6) kinase"	GO:0042823|GO:0000287|GO:0008283|GO:0042816|GO:0006767|GO:0008478|GO:0005634|GO:0044281|GO:0030955|GO:0031402|GO:0031403|GO:0005524|GO:0042803|GO:0005829|GO:0016310|GO:0005737|GO:0006766|GO:0030170|GO:0005654|GO:0008270|GO:0009443|GO:0070062	NP1199201
A_22_P00018348	0.0364972	0.303088	3.29937	down	3.32777	4.61413	3.77515	P	P	P	5.58483	5.79614	5.79543	P	P	P	A_22_P00018348	lnc-ZSCAN10-3	TCCCTGTAGAAGTTCTGCTGCGTGTGGTCCAGCCGTCCCCACTCCTCCCGGGAGAGGTAC	3166516	chr16	3166457	-	FALSE	---	---	DB087096	lnc-ZSCAN10-3:6	---	THC2578756
A_21_P0014601	0.0353056	0.304974	3.27897	down	3.89258	3.72378	3.523	P	A	P	5.24582	6.00447	4.78509	P	P	P	A_21_P0014601	SFPQ	AACGAGAAGGAGTGGAAGGAGGAATGAACGTTTCATTCTCGTTAATAAAGGCATTATCCT	35642045	chr1	35641986	-	FALSE	ENST00000466213	6421	XM_005271111	splicing factor proline/glutamine-rich	GO:0008380|GO:0006397|GO:0005515|GO:0070932|GO:0000976|GO:0044212|GO:0042826|GO:0001047|GO:0005634|GO:0006310|GO:0000122|GO:0016363|GO:0006351|GO:0005737|GO:0042382|GO:0006281|GO:0000166|GO:0000380|GO:0042752|GO:0005654|GO:0048511|GO:0042754|GO:0045892|GO:0000785	THC2520204
A_21_P0012918	0.0432441	0.307279	3.25437	down	3.81248	5.11052	4.27541	P	P	P	5.71801	6.91577	5.57891	P	P	P	A_21_P0012918	XLOC_l2_012150	AAGAAGGAGAAGGAGAAGAAGATGACGTAATAGAACACTGATGGATTCCAACCTTCCTTT	96392247	chr5	96392072	-	FALSE	---	---	---	---	---	---
A_23_P348911	0.00610189	0.308526	3.24122	down	2.97367	2.30444	2.80165	P	A	P	4.56475	4.26795	4.40184	P	P	P	A_23_P348911	LINC01126	TGGTCTAGGGCACTTCTCCCTCCGCGTTCATACAGGTTGCCACAAAAAGCTTGGGCCTGA	43455083	chr2	43455024	+	FALSE	---	100129726	NR_027251	long intergenic non-protein coding RNA 1126	---	THC2481238
A_33_P3399101	0.0124374	0.310571	3.21988	down	3.57212	4.02549	3.09376	P	A	P	5.16844	5.17331	5.52899	P	P	P	A_33_P3399101	CTSL	AAGAGATAACAGATACCTTTTTCGGAATTCATATATTAGGGCTGGGTGGGGTGGCTCACG	90343839	chr9	90343780	+	FALSE	ENST00000342020	1514	---	cathepsin L	GO:0005515|GO:0097067|GO:0005518|GO:0005634|GO:0005764|GO:0005615|GO:0071888|GO:0019886|GO:0042393|GO:0022617|GO:0019882|GO:0030198|GO:0036021|GO:0051603|GO:0030574|GO:0006508|GO:0001968|GO:0043202|GO:0070062|GO:0043394|GO:0005576|GO:0002224|GO:0004197|GO:0002250|GO:0045087|GO:0008234	THC2532309
A_21_P0000586	0.0435353	0.310787	3.21764	down	4.9736	6.38833	5.09915	P	P	P	6.49725	7.41628	7.77987	P	P	P	A_21_P0000586	TTC3P1	AATACTTTGATGATGGCCAAGCAGTGGCTAACAAAATGATGGCTACCACACTCATGGGTC	74960492	chrX	74960433	-	FALSE	---	286495	NR_030737	tetratricopeptide repeat domain 3 pseudogene 1	---	THC2778650
A_21_P0011842	0.0297366	0.311439	3.2109	down	4.91013	3.52996	3.99116	P	A	P	5.7058	6.45681	5.4809	P	P	P	A_21_P0011842	EEF1E1	AACAAACAATGGTCCAAGTCTAACAGGATTGACTACTATAGCAGCTCATCTAGTCAAGCA	8097685	chr6	8097627	-	FALSE	ENST00000446998	9521	NM_001135650	eukaryotic translation elongation factor 1 epsilon 1	GO:0005515|GO:0010467|GO:0005737|GO:0043065|GO:0008285|GO:0043517|GO:0005634|GO:0070062|GO:0006418|GO:0005829	THC2708665
A_22_P00024468	0.0398232	0.3176	3.14861	down	10.8714	12.4147	11.5769	P	P	P	13.1246	13.1645	13.8333	P	P	P	A_22_P00024468	lnc-CTNNA2-1	TTCTGGCAGGCCAGCTTTGAGGGCAACAAAGAGAATGAGAGGGAGCCTGAGACCTGCTGA	79385635	chr2	79385576	+	FALSE	---	---	---	lnc-CTNNA2-1:1	---	THC2550001
A_24_P108738	0.00920853	0.318121	3.14346	down	3.95327	3.22406	3.82983	P	A	P	5.82135	5.01343	5.08404	P	P	P	A_24_P108738	SCARF2	CAGCGCCGCTGCAGCTGGCCGTGCGCCCTCACCACCGCCGCCAGGCTCCGAGGCCGCGCC	20780247	chr22	20780188	-	FALSE	ENST00000623402	91179	NM_153334	"scavenger receptor class F, member 2"	GO:0005515|GO:0016021|GO:0005925|GO:0007157|GO:0006898|GO:0005044	THC2486006
A_33_P3220152	0.0275577	0.321622	3.10924	down	6.11006	6.60528	5.99928	P	P	P	8.33035	7.98119	7.14791	P	P	P	A_33_P3220152	SBNO2	CGCGCTGGGGGAGGGCGCGGGGGCGGGGGGCGCGGCGGGCGGTGGTCCCGAGCGGCAGAG	1108327	chr19	1108268	-	FALSE	ENST00000438103	22904	NM_014963	strawberry notch homolog 2 (Drosophila)	GO:0072675|GO:0002281|GO:0045944|GO:0061430|GO:0050727|GO:0030282|GO:0005575|GO:0045892|GO:0006351	THC2506876
A_23_P2355	0.0132438	0.326716	3.06076	down	3.16966	2.66311	2.98759	P	A	P	4.14186	5.04037	4.36761	P	P	P	A_23_P2355	CBX5	CTTTGAGAGAGGACTGGAACCAGAAAAGATCATTGGGGCAACAGATTCCTGTGGTGATTT	54639976	chr12	54639917	-	FALSE	ENST00000550411	23468	NM_012117	chromobox homolog 5	GO:0005515|GO:0042826|GO:0010369|GO:0005730|GO:0005634|GO:0035064|GO:0005635|GO:0042803|GO:0035097|GO:0005720|GO:0000118|GO:0007596|GO:0017053|GO:0003682|GO:0016605|GO:0070491|GO:0000776|GO:0016032|GO:0005654|GO:0031618|GO:0030674|GO:0045892	THC2543374
A_23_P30175	0.0263415	0.328551	3.04366	down	4.44426	3.20975	4.07211	P	A	P	5.62532	5.99174	5.0276	P	P	P	A_23_P30175	ERBB2IP	TAGTTGAGGCTAGTCTGGAACCTTTCATTAGAGCAATATTTGGTTATTGCACTTCATTTT	65375899	chr5	65375840	+	FALSE	ENST00000380943	55914	NM_018695	erbb2 interacting protein	GO:0005515|GO:0030056|GO:0031965|GO:0030054|GO:0005886|GO:0045104|GO:0005634|GO:0045175|GO:0006605|GO:0045197|GO:0005604|GO:0005176|GO:0007165|GO:0005737|GO:0007049|GO:0009925|GO:0005178|GO:0007173|GO:0007229|GO:0005200|GO:0016049|GO:0005654|GO:0007155	THC2670825
A_33_P3374085	0.0249536	0.330392	3.02671	down	2.8063	1.8017	2.92961	P	A	P	4.00435	3.75653	4.65652	P	P	P	A_33_P3374085	LRRFIP1	GAAGATACCAGAGGAGGGAATGAGAAGGGCAAAAGCAAAGAAGACTGTACCATGTCCTAA	238672783	chr2	238672724	+	FALSE	ENST00000392000	9208	NM_001137552	leucine rich repeat (in FLII) interacting protein 1	GO:0003725|GO:0005515|GO:0005886|GO:0006357|GO:0005634|GO:0005575|GO:0003677|GO:0042803|GO:0006351|GO:0005829|GO:0008150|GO:0005737|GO:0045087|GO:0032481|GO:0005856|GO:0045892	THC2486418
A_33_P3385765	0.0121818	0.334101	2.99311	down	3.51487	4.32169	4.02211	P	P	P	5.474	5.74486	5.47971	P	P	P	A_33_P3385765	ZNF763	TACTAAAACTACAAAAATTGGCCAGGCGTGGTGGCCTGCTTCTGTAATCCTAGCTAGTTG	12091089	chr19	12091030	+	FALSE	ENST00000343949	284390	NM_001012753	zinc finger protein 763	GO:0003712|GO:0006357|GO:0005634|GO:0003677|GO:0046872|GO:0006351|GO:0070062	THC2500987
A_21_P0014782	0.0328941	0.336658	2.97038	down	9.35647	10.6432	9.79272	P	P	P	11.3055	11.567	11.8792	P	P	P	A_21_P0014782	---	CTATGGCTACCCACTCCCAAAACTACAGCAGGCTACAAGGAATCCCTGAAATGAATAGAA	84545205	chr9	84545146	-	FALSE	ENST00000585776	---	AK097447	---	---	THC2516830
A_24_P724153	0.0115362	0.338659	2.95282	down	4.15203	4.48125	3.55373	P	P	P	5.97534	5.63625	5.33878	P	P	P	A_24_P724153	---	AACAGATTCTTGGACTGGTGGTTCATATCCATCAGCTCGTTCAACTTTAGCACCTGTCTC	152025742	chr4	152025683	-	FALSE	---	---	CU688199	---	---	THC2597514
A_33_P3351524	0.040428	0.339366	2.94667	down	7.48995	8.28333	7.07843	P	P	P	9.27346	9.35162	9.16449	P	P	P	A_33_P3351524	---	AACAGATTTAACTCCCTCCCAGCAATCCAGATTAATTTAATATGCTTTCTTAACGGCATT	9588552	chr4	9588493	-	FALSE	---	---	---	---	---	---
A_22_P00002166	0.0189645	0.341688	2.92665	down	6.36638	5.54876	6.2559	P	P	P	7.37586	7.19791	8.17592	P	P	P	A_22_P00002166	FAM229A	CGCCGCCCCCGAGTCCCAGGACAGCCCGGAGGCGGTAGCGACGGAGCACAACCCGGTCAG	32827390	chr1	32827331	-	FALSE	ENST00000415596	100128071	NM_001167676	"family with sequence similarity 229, member A"	---	THC2592817
A_33_P3387170	0.0444489	0.347146	2.88063	down	2.85236	4.29355	3.2996	P	P	P	4.90047	5.50349	4.92725	P	P	P	A_33_P3387170	MATN1-AS1	TGCCCAAGGGACCAACCCAAGAAAGATGCCGCCCTTATCCTCCTCCACTCCCCGGTATGA	31194140	chr1	31192359	+	FALSE	---	100129196	NR_034182	MATN1 antisense RNA 1	---	THC2624896
A_21_P0003579	0.0431897	0.352005	2.84087	down	7.46589	8.73735	7.49264	P	P	P	9.84422	9.54018	9.13592	P	P	P	A_21_P0003579	lnc-CPEB2-5	GACCATGTAAACCTACATTGAAATTTGTGTGACTCCCTCCCCCTCAACCAGCTTAGAAGT	14094861	chr4	14063961	+	FALSE	---	---	---	lnc-CPEB2-5:2	---	---
A_22_P00016330	0.0263051	0.354566	2.82035	down	2.82607	3.7607	2.71475	P	A	A	4.48004	4.52339	4.97408	P	P	P	A_22_P00016330	lnc-TMEM151A-1	GGGCTGATACCGCTGGAGTATGCAGTTCGCCGCCGCGCCCGAATGAGGCGGGGCCTGCGA	66080463	chr11	66080404	+	FALSE	---	---	DA554227	lnc-TMEM151A-1:1	---	---
A_33_P3244998	0.0128388	0.355907	2.80972	down	6.66189	7.54996	6.91371	P	P	P	8.83872	8.56891	8.28638	P	P	P	A_33_P3244998	ODF2L	CTGAAACTGGATCCCTTCCTTACACCTTATACAAAAATCAATTCAAGATGGATTAAAGAC	86816981	chr1	86816922	-	FALSE	ENST00000295025	57489	NM_001007022	outer dense fiber of sperm tails 2-like	GO:0005813	NP1161795
A_33_P3567967	0.0346298	0.356584	2.80439	down	3.67162	3.75017	3.91404	P	A	P	4.75564	5.09798	5.76775	P	P	P	A_33_P3567967	FLJ11292	CTGGCAAATTGGATAGAGTCAAAATCCATCATTGTGCTGTATTCAGGAGACCCATCTCAC	86511671	chr5	86511612	-	FALSE	---	55338	AK023417	uncharacterized protein FLJ11292	---	THC2486515
A_33_P3302428	0.0454044	0.357464	2.79749	down	5.39122	6.3727	5.1164	P	P	P	7.20984	7.3865	7.0323	P	P	P	A_33_P3302428	TNRC6C	TTCATAGCCTACGTGTGTGTATGTGTGCGTGTTGAAACAGAAGTGTGTGTGTGTGTGCAT	76101733	chr17	76101674	+	FALSE	ENST00000301624	57690	NM_001142640	trinucleotide repeat containing 6C	GO:0005515|GO:0010467|GO:0048011|GO:0001706|GO:0048015|GO:0003723|GO:0060213|GO:0016441|GO:0005829|GO:0060964|GO:0035278|GO:0000166|GO:0007173|GO:0007219|GO:1900153|GO:0008543|GO:0045087|GO:0035195|GO:0035162|GO:0038095	THC2470408
A_33_P3441583	0.0231534	0.358945	2.78594	down	7.62089	8.01917	6.92433	P	P	P	9.19401	9.35647	8.52474	P	P	P	A_33_P3441583	---	TGTTGCGGAAGAAAATAAAACGCGCCCCTCCCACAATAAAAAAGCCGCCGCCCCAAAAAA	---	---	---	---	FALSE	---	---	BM453041	---	---	---
A_33_P3802146	0.00843724	0.369668	2.70513	down	4.14186	4.88804	4.69732	P	P	P	6.26463	6.14959	5.64842	P	P	P	A_33_P3802146	LINC00504	AATCCTCCCTAATTCATTTAATGAGGCCAACATCATCCTGATACCAAAGCCTGACAGAGA	14475344	chr4	14475285	-	FALSE	ENST00000505089	201853	NR_126435	long intergenic non-protein coding RNA 504	---	THC2488506
A_23_P164927	0.0153844	0.376327	2.65726	down	3.15873	2.84818	3.29264	P	A	P	4.31468	4.15568	4.96259	P	P	P	A_23_P164927	SYNGR4	CAAAGTCCCCCCGGCTTGCTATGATGCCTGACAACTAAATATCCTTATCCAAATCAATAA	48879597	chr19	48879538	+	FALSE	ENST00000344846	23546	NM_012451	synaptogyrin 4	GO:0031594|GO:0030672|GO:0016021	THC2478295
A_23_P74330	0.0304597	0.378108	2.64475	down	2.68323	3.6309	2.87725	P	A	P	4.66839	4.48368	4.41829	P	P	P	A_23_P74330	LINC00626	TCAGCCATTGGTCACTTAAGAGCACTAACCCCTCCCTGGTTTGAAGATGTTCTTGACTTT	168761978	chr1	168761919	+	FALSE	ENST00000420691	79100	NR_024160	long intergenic non-protein coding RNA 626	---	THC2618569
A_33_P3590279	0.0459886	0.378151	2.64445	down	4.07053	4.2132	3.0055	P	P	P	5.70972	5.22924	4.63635	P	P	P	A_33_P3590279	---	AGATTTACCAAACAAGCTCTATACTTCGGTTGCCTACGTACCTGTTACCACTTTAAAAAA	62385763	chr17	62385704	-	FALSE	ENST00000461109	---	---	---	---	---
A_23_P145437	0.0420127	0.379237	2.63687	down	3.58165	3.73061	3.97628	P	A	P	4.60476	5.70851	4.9751	P	P	P	A_23_P145437	PHIP	GCTGTTGTTCGAAGACACCTCTTTAACTTTTGGAACTTCTAGTAGAGGACGAGTCCGAAA	79650509	chr6	79650450	-	FALSE	ENST00000479165	55023	NM_017934	pleckstrin homology domain interacting protein	GO:0005515|GO:0008286|GO:2001237|GO:0010800|GO:0043066|GO:0008284|GO:0005158|GO:0008360|GO:0045840|GO:0005634|GO:0006606|GO:0033138|GO:0043568|GO:0045944|GO:0007010|GO:0022604|GO:0070577|GO:0001932|GO:0045893|GO:0040008|GO:0070062	THC2515430
A_21_P0013131	0.0256319	0.380255	2.62981	down	2.84798	3.60873	3.18503	P	A	P	4.28457	4.26197	5.18029	P	P	P	A_21_P0013131	---	TAAAAAAGTGATGTGAACCTTAAGATCACATATGTCATATGGGGGTGAAGGTGGGGGTGG	35513339	chr6	35513280	+	FALSE	ENST00000450618	---	XR_242007	---	---	---
A_33_P3235987	0.0384649	0.380348	2.62917	down	3.62601	4.30221	3.07605	P	P	P	4.82736	4.76303	5.67125	P	P	P	A_33_P3235987	PIN4	TCTGGGATGAGATTCAATGAAGTGGCCACACAATATAGTGAAGATAAAGCCAGGCAAGGG	71416754	chrX	71416695	+	FALSE	ENST00000451079	5303	NM_006223	"protein (peptidylprolyl cis/trans isomerase) NIMA-interacting, 4 (parvulin)"	GO:0000413|GO:0006364|GO:0003755|GO:0005730|GO:0005819|GO:0005634|GO:0003677|GO:0005737|GO:0003690|GO:0005759|GO:0003681|GO:0030684|GO:0070062	THC2548393
A_22_P00003465	0.0165259	0.384384	2.60157	down	4.0813	3.43393	3.85457	P	A	P	5.21428	5.14482	5.2205	P	P	P	A_22_P00003465	MMP25-AS1	GCCGGGGTCCGGGCGCGCCGCCGCCTCGTCGTAGCGCCAGTACTGCCGGCCGCGGACCAG	3108600	chr16	3108541	-	FALSE	---	100507419	NR_123723	MMP25 antisense RNA 1	---	---
A_22_P00003672	0.0320192	0.387106	2.58327	down	6.40182	7.34406	6.26988	P	P	P	8.08475	8.43647	7.77839	P	P	P	A_22_P00003672	CDC42SE1	CGCCGGGCTCCGAGCCGGACGGGTTTCGTAATCGCGTCGCCGCCGCTTCCGCCCTCAGCC	151032154	chr1	151032095	-	FALSE	ENST00000491825	56882	DA776403	CDC42 small effector 1	GO:0006909|GO:0007165|GO:0005737|GO:0005886|GO:0005198|GO:0008360|GO:0005856|GO:0005095|GO:0043086	THC2528942
A_22_P00016621	0.0440404	0.391376	2.55509	down	3.05428	4.3117	3.34077	P	P	P	4.60743	5.12646	5.26844	P	P	P	A_22_P00016621	LOC100507316	TTCCCAACTTCGCAGAAGAGCTTCATCGGCCCCCCGCTAGAGACCTCAGACCGCAGCCAT	144363753	chr8	144363694	-	FALSE	---	100507316	NR_120683	uncharacterized LOC100507316	---	THC2505495
A_23_P26468	0.0386999	0.391876	2.55183	down	3.6325	4.70901	3.8354	P	P	P	5.40164	5.34026	5.70138	P	P	P	A_23_P26468	RHBDL1	TGCCCACCCCCCGTGTTCATGGCCTCGGTCACTCTTGCCCAGATCATCGTGTTCCTGTGT	726988	chr16	726855	+	FALSE	ENST00000219551	9028	NM_001278720	"rhomboid, veinlet-like 1 (Drosophila)"	GO:0007165|GO:0016020|GO:0004252|GO:0005887|GO:0006508	THC2606656
A_33_P3236340	0.0351585	0.398825	2.50736	down	4.02958	5.00927	5.00778	P	P	P	6.20589	5.76447	6.21322	P	P	P	A_33_P3236340	---	GGAAGGGCATTCACTGCGTTATATAGATATATATATACACACACACACACACACATATAT	6693935	chr4	6693876	-	FALSE	ENST00000624473	---	AF289593	---	---	NP426365
A_23_P166023	0.0481835	0.401333	2.49169	down	4.96306	4.48561	3.85858	P	P	P	5.34534	6.40573	5.46744	P	P	P	A_23_P166023	PFDN4	CAGATGATGATTGCTTAATGATACCTTATCAAATTGGTGATGTCTTCATTAGCCATTCTC	52831944	chr20	52831885	+	FALSE	ENST00000487129	5203	NM_002623	prefoldin subunit 4	GO:0005739|GO:0005515|GO:0005737|GO:0006457|GO:0016272|GO:0051087|GO:0051084|GO:0005634|GO:0051082|GO:0044267|GO:0005829	THC2608382
A_33_P3315899	0.0341197	0.402559	2.48411	down	4.72545	5.60158	4.62215	P	P	P	5.7568	6.66072	6.52767	P	P	P	A_33_P3315899	---	GGCGGCCGGGAGGCGGGGGCGGAGGGGGCAGAGGAGGAGGAGCGGGGAAGGACCGACGGT	19193130	chr20	19193071	-	FALSE	---	---	---	---	---	---
A_21_P0003244	0.048896	0.403376	2.47908	down	7.14669	8.29721	7.34667	P	P	P	9.16449	8.78987	9.01735	P	P	P	A_21_P0003244	lnc-EPHA6-1	ATCTTGGACAACCAGCTATCACCAGGCTCGATAGGTTTGTCGCCTCTACCTATAAATCTT	96336779	chr3	96336720	+	FALSE	---	---	---	lnc-EPHA6-1:3	---	THC2492281
A_19_P00318815	0.0280322	0.404512	2.47211	down	3.54484	4.01295	3.00591	P	A	P	5.12421	4.80894	4.68439	P	P	P	A_19_P00318815	---	GTTGCTGCCACCTACCTTCCCTGCTTTGGGAGGATACATTTTCTCCTCTTGCTTAGAAGT	37188392	chr8	37188333	-	FALSE	ENST00000518765	---	XR_426301	---	---	THC2500167
A_22_P00001598	0.0257254	0.40512	2.4684	down	4.65092	4.71424	5.5754	P	P	P	6.67408	6.27786	6.01788	P	P	P	A_22_P00001598	---	GGCTGTCCCGCGCGCGGGGCCATCGCGGCCGCCCCCGCATCCAGCGCCCGGGCCGCCGCG	74952117	chr11	74952058	-	FALSE	ENST00000530792	---	---	---	---	---
A_33_P3262555	0.0136722	0.405744	2.46461	down	4.03217	3.73012	4.32623	P	A	P	5.66105	5.41254	4.87165	P	P	P	A_33_P3262555	MEX3D	ATCTGCGGCAAGAGCGAGCCCGAGTGTCCCGCCTGCCGCACGCCGGCCACCCAGGCCATT	1555636	chr19	1555577	-	FALSE	ENST00000402693	399664	NM_001174118	mex-3 RNA binding family member D	GO:0061157|GO:0010609|GO:0048471|GO:0017091|GO:0008270|GO:0005634	THC2473313
A_23_P219060	0.000104966	0.409602	2.44139	down	4.61554	4.56124	4.72818	P	P	P	5.92493	5.81542	6.02517	P	P	P	A_23_P219060	GPSM3	TGAGAGATTAAGACTATTCTCCCAGTCCCACTACCAGCACCCCCGATCCCTGAGACTGAG	32158711	chr6	32158652	-	FALSE	ENST00000614086	63940	NM_022107	G-protein signaling modulator 3	GO:0008150|GO:0003674|GO:0050790|GO:0005737|GO:0008277|GO:0005575|GO:0005092	THC2507595
A_33_P3489646	0.0490572	0.409983	2.43912	down	5.66806	6.77593	6.28008	P	P	P	7.68635	7.5657	7.53477	P	P	P	A_33_P3489646	SPI1	ACCCGGGGTACTGCCTTGGGAGTCTCAAGTCCGTATGTAAATCAGATCTCCCCTCTCACC	47376523	chr11	47376464	-	FALSE	ENST00000227163	6688	NM_001080547	Spi-1 proto-oncogene	GO:0005515|GO:0000790|GO:0090241|GO:0003700|GO:0006366|GO:0051525|GO:0000981|GO:0003705|GO:0003723|GO:0044027|GO:0045944|GO:0045347|GO:0001085|GO:0030098|GO:0030225|GO:0030851|GO:0043011|GO:0035019|GO:0002320|GO:0060033|GO:0006357|GO:0001205|GO:0001047|GO:0000122|GO:0000978|GO:0000979|GO:0001078|GO:0001077|GO:0043966|GO:0045814|GO:0045646|GO:0030218|GO:0000980|GO:0045893|GO:0045892	THC2603968
A_23_P82206	0.00948782	0.410909	2.43363	down	4.58095	4.47673	3.91629	P	P	P	5.48871	5.88619	5.4959	P	P	P	A_23_P82206	ECHDC1	ATGACTCCAGAGAGTAAGATCAGATTCGTCCACAAAGAGATGGGCATAATACCAAGCTGG	127611418	chr6	127611359	-	FALSE	ENST00000488087	55862	NM_018479	ethylmalonyl-CoA decarboxylase 1	GO:0008152|GO:0016831|GO:0004492|GO:0070062|GO:0005829	THC2578066
A_33_P3412716	0.0387374	0.412409	2.42478	down	4.79177	5.4829	4.48821	P	P	P	6.33599	6.64358	5.62233	P	P	P	A_33_P3412716	---	TGAAATGCCCAGGCCATCAGGGTAGGCATATATGAAAAGCCACAAAGTATCTGAAAGATG	55432954	chr5	55432895	+	FALSE	ENST00000467688	---	---	---	---	---
A_33_P3422258	0.0228703	0.412611	2.42359	down	6.38353	5.95832	5.42362	P	P	P	6.90969	7.48263	7.30356	P	P	P	A_33_P3422258	C8orf59	CCAAGAACAAATTAAGAGGGCCGAAGTCCAGGAATGTATTTCACATAGCCAGCCAAAAAA	86129724	chr8	86129665	-	FALSE	ENST00000321777	401466	NM_001293320	chromosome 8 open reading frame 59	---	THC2559684
A_22_P00009667	0.00325097	0.412634	2.42345	down	3.38728	3.68052	3.23575	P	A	P	4.64623	4.85256	4.66261	P	P	P	A_22_P00009667	---	AGAGATAATCTGAAACAACAGTATATGACTCAAACTCTCCTCTTCTCCTCCTCCCATAAG	35398850	chr22	35398791	-	FALSE	ENST00000427881	---	XR_244424	---	---	THC2611823
A_23_P43141	0.0499557	0.41744	2.39555	down	9.10295	9.08658	8.05549	P	P	P	10.2766	9.87054	10.0774	P	P	P	A_23_P43141	EIF3E	AAAGCTGAGGGAATGTGAATCAGTGCTTGTGAATGACTTCTTCTTGGTGGCTTGTCTTGA	109228662	chr8	109226908	-	FALSE	ENST00000519517	3646	NM_001568	"eukaryotic translation initiation factor 3, subunit E"	GO:0005515|GO:0010467|GO:0033290|GO:0016282|GO:0005852|GO:0001731|GO:0003743|GO:0005634|GO:0006412|GO:0006413|GO:0005829|GO:0005737|GO:0047485|GO:0016020|GO:0000184|GO:0016605|GO:0006446|GO:0045947|GO:0005654|GO:0044267|GO:0000785|GO:0070062	THC2494284
A_22_P00016355	0.0173154	0.422149	2.36883	down	4.66379	5.05961	4.69252	P	P	P	6.13123	6.3612	5.58483	P	P	P	A_22_P00016355	LOC728730	GAAACGCCTCGGCTTTTCTGCGGACCCGCGCCCGGCCGCTGCCGCCGGACGCTTGAAAAG	39664676	chr2	39664617	+	FALSE	---	728730	NR_037875	uncharacterized LOC728730	---	THC2670115
A_22_P00007064	0.0148585	0.424909	2.35344	down	3.62475	3.98283	3.17831	P	A	P	4.66916	4.68047	5.18826	P	P	P	A_22_P00007064	LOC100505938	CGCTTCTACCCTCCAGCAGACGCCCGCCGGAGCGACCCCTCCCAGGGTGACCGGGGGAAG	8302049	chr7	8301990	+	FALSE	---	100505938	NR_125740	uncharacterized LOC100505938	---	---
A_21_P0000760	0.007794	0.428976	2.33113	down	3.36829	4.00659	3.57472	P	A	P	5.01502	4.58941	5.04037	P	P	P	A_21_P0000760	TMPRSS4-AS1	ATGATATTTACTGTGAATAGGAAGTCCCACGCCCCCCAGGTTATAACTCCTCTACAGGAT	117929953	chr11	117929894	-	FALSE	---	100526771	NR_038318	TMPRSS4 antisense RNA 1	---	---
A_33_P3316379	0.0149146	0.436193	2.29257	down	7.14192	7.24026	6.54511	P	P	P	8.36432	8.3824	7.78957	P	P	P	A_33_P3316379	---	TTGAACATGAGATGACACACATACTTATGGTGTCTGAAGGTCATGATCATGTTACCATAT	239216043	chr1	239215984	-	FALSE	---	---	---	---	---	---
A_24_P831309	0.0495287	0.437939	2.28342	down	3.62369	3.56815	3.48201	P	A	P	4.35422	4.50329	5.23313	P	P	P	A_24_P831309	C1orf229	GGCTGTCAGTCCACGCGGGCCGCCGAGAGGACGCGCCCACCCCACCCTCCAAACGCCGTC	247275358	chr1	247275299	-	FALSE	ENST00000408893	388759	NM_207401	chromosome 1 open reading frame 229	---	THC2486261
A_23_P31671	0.046535	0.44649	2.23969	down	8.54429	8.2529	7.53148	P	P	P	9.44555	9.15254	9.38234	P	P	P	A_23_P31671	UQCRB	AAGCCATAAGAAGACTTCCTGAGAACCTTTATAATGACAGGATGTTTCGCATTAAGAGGG	97244123	chr8	97244064	-	FALSE	ENST00000521948	7381	NM_006294	ubiquinol-cytochrome c reductase binding protein	GO:0022904|GO:0009060|GO:0005746|GO:0006122|GO:0005743|GO:0005750|GO:0044281|GO:0044237|GO:0055114|GO:0006119	THC2546410
A_33_P3397161	0.017552	0.446656	2.23886	down	3.10814	3.36861	3.085	P	A	P	4.48443	3.92465	4.57636	P	P	P	A_33_P3397161	SHANK2-AS3	TCTAGGACTCGCCCACCTGCTCCCATGCAAATCCTCATTTTAACTCTGGATCCCAGTGAA	70709665	chr11	70709606	+	FALSE	---	220070	NR_073536	SHANK2 antisense RNA 3	---	---
A_33_P3354955	0.00736669	0.448456	2.22988	down	4.007	3.78404	3.42195	P	A	P	4.70532	5.1994	4.78856	P	P	P	A_33_P3354955	ESF1	GGAAGTCCATTGATCCTGCTTTGTCAATGTTGATTAAATCTATAAAAACCAAAACAGAGC	13695615	chr20	13695556	-	FALSE	ENST00000202816	51575	NM_016649	"ESF1, nucleolar pre-rRNA processing protein, homolog (S. cerevisiae)"	GO:0006355|GO:0005730|GO:0005654|GO:0005615|GO:0006351	THC2462885
A_33_P3386506	0.025255	0.451718	2.21377	down	4.78641	4.81029	4.95195	P	P	P	5.64672	6.34246	5.91835	P	P	P	A_33_P3386506	NFKBIL1	ATGGCCTCCACTTCCCGCCGCCAACGCCGAGAACGTCGCTTTCGTCGTTACTTGTCTGCA	31516011	chr6	31515952	+	FALSE	ENST00000460131	4795	NM_001144961	nuclear factor of kappa light polypeptide gene enhancer in B-cells inhibitor-like 1	GO:0005515|GO:0071222|GO:0034122|GO:0007249|GO:0032720|GO:0042994|GO:0032088|GO:0005654|GO:0005634|GO:0045111|GO:0031665|GO:0005829	THC2544952
A_33_P3312564	0.0420005	0.454707	2.19922	down	5.33204	5.9378	4.88186	P	P	P	6.97446	6.48198	6.1918	P	P	P	A_33_P3312564	---	TGGCCTCAGTAGGTGCCACCGGTGTTTCCATCAGTACATGAAGGATATAGGTTTCATTTA	175266367	chr1	175266308	+	FALSE	ENST00000414733	---	---	---	---	---
A_33_P3223759	0.0297778	0.460723	2.1705	down	3.97083	4.44205	3.63172	P	P	P	5.60281	4.97745	4.80812	P	P	P	A_33_P3223759	MED13	CCGAATGCCATAACACTGAGTTGTACAAATTGTGATTGAGGAAATGAAAAGGTTTATACT	60020094	chr17	60020035	-	FALSE	ENST00000397786	9969	NM_005121	mediator complex subunit 13	GO:0003712|GO:0010467|GO:0001104|GO:0006367|GO:0003713|GO:0005634|GO:0046966|GO:0030374|GO:0016020|GO:0030518|GO:0042809|GO:0045944|GO:0016592|GO:0004872|GO:0005654|GO:0045893|GO:0030521	THC2604349
A_33_P3451157	0.00565435	0.461242	2.16806	down	3.85457	3.66699	3.3406	P	A	P	4.48071	4.96656	4.76927	P	P	P	A_33_P3451157	---	TAGAAAAAGGGAAAAAATTAGCCGGGTGTGGTAATACATGCCTGTGGTCTCAGCTACTCG	8024221	chr8	8024162	+	FALSE	---	---	AK054980	---	---	THC2513702
A_33_P3344332	0.0324395	0.464849	2.15124	down	7.90189	8.49298	7.55678	P	P	P	9.33499	9.2346	8.80211	P	P	P	A_33_P3344332	RPL39	ATCAGGTACAACTCCAAAAGGAGACAATGGAGAAGAACCAAGCTGGGGCTGTAAGGAATT	118923875	chrX	118920641	-	FALSE	ENST00000468844	6170	NM_001000	ribosomal protein L39	GO:0010467|GO:0003735|GO:0050830|GO:0019083|GO:0003723|GO:0006614|GO:0019058|GO:0006415|GO:0005615|GO:0006412|GO:0006413|GO:0002227|GO:0005829|GO:0006414|GO:0000184|GO:0019731|GO:0016032|GO:0022625|GO:0044267	THC2588217
A_23_P65768	0.0395781	0.468969	2.13234	down	5.95077	5.61198	5.03225	P	P	P	6.82417	6.49794	6.67612	P	P	P	A_23_P65768	RSL24D1	TCCTGCATTGCCATCTACATAATATCAGATATTACGGATGTTAGATTGCATCTCAGTGTT	55474228	chr15	55474169	-	FALSE	ENST00000260443	51187	NM_016304	ribosomal L24 domain containing 1	GO:0042254|GO:0005730|GO:0005634	THC2535982
A_21_P0011184	0.0217779	0.470552	2.12516	down	4.04319	3.37228	3.31839	P	A	P	4.43702	4.66995	4.95999	P	P	P	A_21_P0011184	XLOC_l2_003992	ATGAACTCAATCCAAATAATTCCACTGCTATGCTGAGAAAAGGGTATTCAATAGCTACTT	52744164	chr13	52744105	-	FALSE	---	---	---	---	---	---
A_23_P215875	0.0234993	0.470683	2.12457	down	5.60577	5.11689	4.86209	P	P	P	5.88619	6.61985	6.34835	P	P	P	A_23_P215875	DCAF13	AAACGTATAGCTCGTCATCGACATCTACCAAAATCTATCTATAGCCAGATTCAGGAACAG	104453817	chr8	104453758	+	FALSE	ENST00000518554	25879	NM_015420	DDB1 and CUL4 associated factor 13	GO:0000462|GO:0016567|GO:0032040|GO:0005730|GO:0080008	THC2515308
A_33_P3405285	0.00100091	0.471778	2.11964	down	3.85922	4.12894	3.941	P	A	P	4.97195	5.24414	4.95963	P	P	P	A_33_P3405285	GSG1	AACCCAAATGTCCATCAATGATAGACTGGATTAAGAAAATGTGGCACATATACACCATGG	13236885	chr12	13236826	-	FALSE	ENST00000229465	83445	NM_001080554	germ cell associated 1	GO:0005789|GO:0016021|GO:0070063	NP1147275
A_33_P3342295	0.00291215	0.474463	2.10765	down	5.78393	5.60484	5.37646	P	P	P	6.5201	6.5771	6.89475	P	P	P	A_33_P3342295	VSX1	CCCAGCCGTCCGCCGCCTGCGCTCGGCCGCCAGAAGCGCAGCGACAGCGTCTCCACGTCC	25062369	chr20	25062310	-	FALSE	ENST00000376707	30813	NM_199425	visual system homeobox 1	GO:0043565|GO:0006355|GO:0003700|GO:0060040|GO:0042551|GO:0005634|GO:0005575|GO:0007601|GO:0050896|GO:0006351	THC2485290
A_33_P3370226	0.0410692	0.476684	2.09782	down	11.0036	10.7184	10.1829	P	P	P	11.6904	11.8182	11.716	P	P	P	A_33_P3370226	RPL7	TGAAGCTCAACAAGGCTTCGATTAACATGCTGAGGATTGTAGAGCCATATATAGCATGGG	74204068	chr8	74204009	-	FALSE	ENST00000493874	6129	NM_000971	ribosomal protein L7	GO:0005515|GO:0010467|GO:0006364|GO:0003723|GO:0019058|GO:0005634|GO:0003729|GO:0006412|GO:0006413|GO:0042803|GO:0006414|GO:0005829|GO:0000184|GO:0016032|GO:0042273|GO:0070062|GO:0003735|GO:0006614|GO:0019083|GO:0006415|GO:0003677|GO:0016020|GO:0030529|GO:0022625|GO:0005925|GO:0044267	THC2551101
A_21_P0000867	0.0454341	0.477124	2.09589	down	7.81609	8.1622	7.14192	P	P	P	8.4981	8.74269	9.17694	P	P	P	A_21_P0000867	ZBTB20-AS1	CCTGCTTTCACAATTTTCTGTGTGTGTGTGTGTGTATTAAACAAAGTGAACTAAGAAGCC	114107825	chr3	114107766	+	FALSE	---	100131117	NR_038993	ZBTB20 antisense RNA 1	---	---
A_24_P352445	0.034791	0.478845	2.08836	down	4.44676	3.885	3.67924	P	A	P	5.09068	5.01052	5.20313	P	P	P	A_24_P352445	MRPL42	TTTTTTAGTGCATCACAATGACAAAGGGGTGGTTTTCTTTCACCCAAGAATGTGCTTTCC	93895891	chr12	93895832	+	FALSE	ENST00000358678	28977	NM_172177	mitochondrial ribosomal protein L42	GO:0070124|GO:0005739|GO:0070125|GO:0070126|GO:0032543|GO:0006996|GO:0003735|GO:0005886|GO:0005743|GO:0006412|GO:0005763	THC2485921
A_23_P434900	0.0451196	0.479478	2.0856	down	3.45093	3.20344	4.13642	P	A	P	4.56276	4.65828	4.89785	P	P	P	A_23_P434900	HN1L	GCCAACATTTTTTAGAGCTGTACCAAAACAAAAAGCCTGTACTCACATCACAATGTCATT	1751348	chr16	1751289	+	FALSE	ENST00000248098	90861	NM_144570	hematological and neurological expressed 1-like	GO:0005737|GO:0005886|GO:0005634	THC2469324
A_23_P111343	0.0264718	0.484828	2.06259	down	5.30524	5.99928	5.42257	P	P	P	6.30866	7.03457	6.51706	P	P	P	A_23_P111343	BCLAF1	CAAAAGAGGAAGAGGTCGTGGTACTTTTCAACGTGGCAGAGGGCGCTTTAACTTCAAAAA	136582580	chr6	136582521	-	FALSE	ENST00000526228	9774	NM_014739	BCL2-associated transcription factor 1	GO:0005515|GO:0043065|GO:2001022|GO:0005730|GO:0006915|GO:2001244|GO:0005634|GO:0043620|GO:2000144|GO:0003677|GO:0006351|GO:0005737|GO:0005654|GO:0045892	THC2528492
A_33_P3288694	0.0309884	0.490476	2.03884	down	4.23961	4.72129	3.8976	P	P	P	4.92969	5.61957	5.42759	P	P	P	A_33_P3288694	LOC101929243	AACCTTCCACCCACTCCGTCAGGAACAACCCAATCAAAATAAAGTCATGAGAATTTAGCA	34665248	chr6	34665191	+	FALSE	---	101929243	XR_249973	uncharacterized LOC101929243	---	THC2683565
A_23_P92629	0.0469691	0.494152	2.02367	down	4.35039	3.6649	3.58657	P	A	P	4.35948	5.12421	5.16406	P	P	P	A_23_P92629	CWC27	ATCTTGTTTTGCAAATTGTGGAATGATGTAAGCAAATGCTTTTGGTTACTGGTACATGTG	64314345	chr5	64314286	+	FALSE	ENST00000545000	10283	NM_005869	CWC27 spliceosome-associated protein homolog (S. cerevisiae)	GO:0000413|GO:0006457|GO:0000398|GO:0003755|GO:0071013	THC2462119
A_32_P54018	0.0395268	0.495848	2.01675	down	4.38028	3.98089	3.51816	P	A	P	5.00098	5.36117	4.57438	P	P	P	A_32_P54018	KIAA1143	AGCCTCAAGTGGTGGTTTTAAAAAAGGGAGACCTGTCAGTTGAAGAAGTCACGAAAATTA	44795802	chr3	44795743	-	FALSE	ENST00000556746	57456	NM_020696	KIAA1143	---	THC2578924
Fold-Change cut-off: 2.0
P-value cut-off: 0.05
compare: g2_VS_g1
foldchange: The ratio (not logarithm) of normalized intensities between two conditions; formula: foldchange=average(power(2,signal(CASE)))/average(power(2,signal(CONTROL))).
foldchange (abs): The absolute ratio (not logarithm) of normalized intensities between two conditions; formula: if foldchange>1,foldchange(abs)=foldchange,foldchange<1,foldchange(abs)=1/foldchange.
